# Supplementary material
Source: publisher figshare collection journal article supplement (https://frontiersin.figshare.com/ndownloader/files/21493926)
Supplement: Supplementary file 1 [file 21493926]

## Sheet: 1975 2015
COUNTRY	YEAR	POPULATION					HEALTH																						AGRICULTURAL PRODUCTION						ECOLOGICAL FOOTPRINT
		TOTAL	URBAN	RURAL			OVERWEIGHT											OBESITY								HYPERGLYCEMIA	DIABETES	MORTALITY RATE	SUGAR CANE	OIL	CORN	WHEAT	BEANS	OATS	CH4	CO2	FERTILIZERS	LAND USE
		1000 persons					PREVALENCE 5-19 YEARS BMI >+1 STANDARD DEVIATION					PREV. ADULTS BMI>25						PREVALENCE 5-19 YEARS BMI >+2 STANDARD DEVIATION					PREV. ADULTS BMI>30				ASSOCIATED MORTALITY	100 000 POPULATION	PRODUCTION	PRODUCTION	PRODUCTION	PRODUCTION	PRODUCTION	PRODUCTION	TOTAL EMISSIONS		CONSUMPTION	TOTAL AREA	LAND SURFACE	ARABLE AREA	OTHER	FOREST
					AMBOS	AMBOS	CHILDREN	AMBOS	AMBOS	GIRLS	BOYS	ADULTS				WOMEN	MEN	CHILDREN			GIRLS	BOYS	ADULTS	WOMEN	MEN		ADULTS		TONS	TONS	TONS	TONS	TONS	TONS	GIGAGRAMS	GIGAGRAMS	TONS	1000 HECTARES	1000 HECTARES	1000 HECTARES	1000 HECTARES	1000 HECTARES
MEXICO	1975	60872.4	38727.7	22981	11.3	11.1	11.3	33.8	37.3	12.4	10.3	33.8	2.9	2.4	2	38.2	29.2	2.4	8.3	9.5	2	2.8	8.3	11.4	5.1	SD	SD	SD	35840576	1149148	8448708	2798219	1027303	87486	1654.49	62271.9	1073460	196438	194395	97551	SD	SD
	1976	62623.8	40308.3	23178	11.8	11.6	11.8	34.5	38.1	12.9	10.8	34.5	3.1	2.5	2.1	38.9	29.9	2.5	8.6	9.9	2.1	2.9	8.6	11.8	5.3	SD	SD	SD	31386544	726893	8017294	3363299	739812	47557	1723.31	64896.9	1120260	196438	194395	97551	SD	SD
	1977	64345.9	41907.8	23353	12.4	12.1	12.4	35.2	39	13.4	11.4	35.2	3.3	2.7	2.3	39.6	30.6	2.7	8.9	10.3	2.2	3.1	8.9	12.1	5.6	SD	SD	SD	29397344	1250216	10137914	2455774	770093	49125	1756.55	65998.8	1067730	196438	194395	97601	SD	SD
	1978	66039.5	43514.1	23499	12.9	12.6	12.9	35.9	39.8	13.9	12	35.9	3.5	2.9	2.4	40.2	31.4	2.9	9.3	1.07	2.4	3.3	9.3	12.5	5.9	SD	SD	SD	35474848	1147892	10930077	2784660	948744	60294	1772.59	66222.6	1066620	196438	194395	98198	SD	SD
	1979	67709.7	45108.9	23607	13.5	13.1	13.5	36.6	40.6	14.5	12.6	36.6	3.8	3	2.6	40.9	32.2	3	9.6	11.1	2.6	3.5	9.6	12.9	6.2	SD	13450	19.8642	34587408	1429702	8457899	2286525	640514	49913	1780.62	66884.1	1134400	196438	194395	97998	SD	SD
	1980	69360.9	46671.7	23681	14.1	13.7	14.1	37.4	41.4	15	13.2	37.4	4	3.2	2.8	41.6	33	3.2	10	11.5	2.7	3.7	10	13.3	6.5	4.9	14599	21.0479	35278624	1029092	12374400	2784914	935174	64150	1852.88	70084.3	1237910	196438	194395	98180	SD	SD
	1981	70992.2	48090.1	23826	14.7	14.3	14.7	38.1	42.2	15.6	13.8	38.1	4.3	3.4	2.9	42.3	33.8	3.4	10.4	11.9	2.9	4	10.4	13.8	6.8	5	15385	21.6714	33197404	1166454	13988074	3193234	1331287	93689	1919.08	74041.8	1560990	196438	194395	98210	SD	SD
	1982	72602.5	49479.4	23936	15.3	14.9	15.3	38.9	43	16.1	14.4	38.9	4.5	3.7	3.1	43	34.6	3.7	10.8	12.3	3.1	4.2	10.8	14.2	7.2	5.1	16728	23.0405	35511016	954850	10119665	4391421	979802	75312	1964.86	75539.8	1671940	196438	194395	98315	SD	SD
	1983	74196.5	50857.7	24023	15.9	15.5	15.9	39.6	43.7	16.7	15.1	39.6	4.8	3.9	3.3	43.6	35.5	3.9	11.2	12.8	3.3	4.4	11.2	14.6	7.5	5.3	18832	25.3812	34232016	1107601	13188000	3463296	1285171	171837	1987.08	76076.8	1485800	196438	194395	101020	SD	SD
	1984	75780.6	52252.5	24099	16.5	16.1	16.5	40.4	44.5	17.3	15.7	40.4	5.1	4.1	3.5	44.3	36.3	4.1	11.6	13.2	3.5	4.7	11.6	15.1	7.9	5.3	19349	25.5329	34969728	1056265	12788809	4505245	930692	185560	2007.37	77428.6	1660900	196438	194395	101030	SD	SD
	1985	77360.7	53683.9	24175	17.1	16.7	17.1	41.1	45.3	17.9	16.4	41.1	5.4	4.3	3.8	45	37.1	4.3	12	13.6	3.7	5	12	15.5	8.3	5.4	20824	26.9181	34430840	1173106	14103454	5214315	911908	137754	2071.19	80067.2	1764100	196438	194395	101435	SD	SD
	1986	78934.1	55157.2	24253	17.7	17.3	17.7	41.9	46	18.4	17	41.9	5.7	4.6	4	45.6	37.9	4.6	12.4	14.1	4	5.2	12.4	15.9	8.6	5.5	23132	29.3054	44271184	934484	11909708	4769411	1085536	125744	2110.84	81291.3	1796600	196438	194395	101441	SD	SD
	1987	80503.1	56669.1	24330	18.3	17.8	18.3	42.6	46.8	19	17.7	42.6	6	4.8	4.2	46.2	38.7	4.8	12.8	14.5	4.2	5.5	12.8	16.3	9	5.6	24013	29.8287	45874232	1147186	11606945	4415391	1023734	136702	2049.27	80020.9	1887880	196438	194395	102550	SD	SD
	1988	82083.9	58226.9	24408	19	18.4	19	43.2	47.5	19.6	18.3	43.2	6.3	5.1	4.4	46.8	39.5	5.1	13.2	15	4.4	5.8	13.2	16.8	9.4	5.7	25044	30.5102	42735216	738397	10592291	3665126	862428	121784	2048.89	78455.8	1757400	196438	194395	103051	SD	SD
	1989	83697.9	59835.2	24492	19.6	19	19.6	44	48.2	20.2	19	44	6.7	5.4	4.7	47.4	40.3	5.4	13.6	15.4	4.7	6.1	13.6	17.2	9.8	5.8	25609	30.5969	43910480	1161076	10952847	4374739	593436	118772	2154.88	81950.4	1739900	196438	194395	104050	SD	SD
	1990	85357.9	61475.4	24602	20.2	19.6	20.2	44.7	49	20.8	19.7	44.7	7	5.7	4.9	48.1	41.1	5.7	14	15.9	4.9	6.4	14	17.6	10.2	5.9	25740	30.1554	39919368	859334	14635439	3930934	1287364	120671	2097.17	81183.6	1798400	196438	194395	105151	19484	69760
	1991	87071.5	63118.7	24771	20.9	20.2	20.9	45.5	49.7	21.4	20.3	45.4	7.4	6	5.2	48.7	41.9	6	14.5	16.4	5.2	6.7	14.5	18.1	10.6	6	27105	31.1296	38433992	933854	14251500	4060738	1378519	120752	2083.6	79474	1619400	196438	194395	106154	18671.4	69569.6
	1992	88828.3	64813.5	24944	21.5	20.9	21.5	46.1	50.5	22	21	46.1	7.8	6.3	5.5	49.3	42.7	6.3	14.9	16.9	5.5	7	14.9	18.6	11	6.2	28296	31.8547	41696600	665115	16929344	3620503	718574	39424	2044.7	78973.4	1616000	196438	194395	106177	18838.8	69379.2
	1993	90600.5	66539.2	25115	22.2	21.5	22.2	46.9	51.2	22.7	21.7	46.9	8.2	6.6	5.8	49.9	43.5	6.6	15.4	17.4	5.8	7.4	15.4	19	11.5	6.3	29572	32.64	42930960	592781	18125264	3582450	1287573	82372	2091.92	80299	1591900	196438	194395	106180	19026.2	69188.8
	1994	92349.1	68271.1	25271	22.9	22.2	22.9	47.6	51.9	23.3	22.5	47.6	8.5	6.9	6.1	50.6	44.4	6.9	15.9	17.9	6.1	7.8	15.9	19.5	11.9	6.5	30320	32.8319	40586768	680655	18235826	4150920	1364239	40607	2080.47	80169.6	1647900	196438	194395	106190	19206.6	68998.4
	1995	94045.6	69987.3	25405	23.6	22.8	23.6	48.4	52.6	23.9	23.2	48.4	8.9	7.3	6.4	51.3	45.2	7.3	16.4	18.4	6.4	8.1	16.4	20.1	12.4	6.6	33315	35.4243	44452952	540515	18352856	3468220	1270915	36439	2054.8	78502	1286000	196438	194395	106195	19392	68808
	1996	95687.5	71608.4	25593	24.2	23.5	24.2	49.2	53.3	24.6	23.9	49.2	9.3	7.6	6.7	52	46.1	7.6	16.9	18.9	6.8	8.5	16.9	20.6	12.8	6.8	34861	36.4322	45080648	535062	18023626	3375008	1349098	121477	1995.47	77794	1636400	196438	194395	106310	19467.4	68617.6
	1997	97281.7	73166	25803	24.9	24.1	24.9	50	53.9	25.2	24.6	50	9.7	8	7.1	52.7	47	8	17.5	19.4	7.1	8.9	17.5	21.2	13.3	7	36025	37.0316	45219512	590001	17656258	3656594	965056	96493	2020.15	78284.8	1644100	196438	194395	106310	19657.8	68427.2
	1998	98821.5	74689.4	25989	25.5	24.7	25.5	50.8	54.6	25.8	25.3	50.8	10.2	8.4	7.4	53.5	47.9	8.4	18	19.9	7.4	9.3	18	21.7	13.8	7.2	41831	42.3299	48895256	598071	18454710	3235080	1260658	88831	2035.24	80154.3	1804300	196438	194395	106325	19833.2	68236.8
	1999	100301	76165.9	26151	26.2	25.3	26.2	51.6	55.2	26.4	26	51.6	10.6	8.7	7.7	54.2	48.7	8.7	18.5	20.3	7.7	9.7	18.5	22.3	14.3	7.3	45632	45.4953	46880000	553442	17706376	3020889	1059156	133053	1987.99	78224.3	1776000	196438	194395	106326	20022.6	68046.4
	2000	101720	77616.9	26257	26.8	26	26.8	52.4	55.9	27	26.6	52.4	11	9.1	8	55	49.6	9.1	19.1	20.8	8	10.1	19.1	22.9	14.8	7.5	46614	45.8259	44100000	382286	17556900	3493210	887868	32485	2009.46	79046.1	1832000	196438	194395	106330	20209	67856
	2001	103067	79052.1	26288	27.4	26.6	27.4	53.2	56.6	27.5	27.3	53.2	11.4	9.4	8.4	55.7	50.5	9.4	19.7	21.3	8.3	10.5	19.7	23.5	15.3	7.7	49833	48.3501	47250000	406257	20134300	3275460	1062970	88886	2016.61	79277.3	1865380	196438	194395	106550	20143.6	67701.4
	2002	104356	80432.1	26292	28	27.1	28	54.1	57.1	28.1	28	54.1	11.8	9.8	8.7	56.4	51.4	9.8	20.2	21.8	8.6	11	20.2	24.1	15.9	7.9	54814	52.5262	45635300	272005	19297800	3236183	1549090	63687	2064.56	77604	1711900	196438	194395	106550	20298.2	67546.8
	2003	105640	81779.3	26277	28.6	27.7	28.6	54.9	57.7	28.6	28.6	54.9	12.2	10.2	9	57.1	52.3	10.2	20.8	22.3	8.9	11.4	20.8	24.7	16.4	8.1	59084	55.9293	47483984	424549	20701400	2715800	1414900	94131	2069.17	78201.5	SD	196438	194395	106550	20452.8	67392.2
	2004	106996	83126.7	26255	29.2	28.3	29.2	55.7	58.3	29.2	29.3	55.7	12.6	10.5	9.4	57.9	53.2	10.5	21.4	22.8	9.2	11.8	21.4	25.3	17	8.3	62098	58.0379	48662244	522341	21670200	2321200	1163400	102896	2058.55	77975.1	SD	196438	194395	106570	20587.4	67237.6
	2005	108472	84497.6	26234	29.8	28.9	29.8	56.7	58.9	29.7	29.9	56.4	13.1	10.9	9.7	58.6	54	10.9	22	23.3	9.5	12.3	22	25.9	17.5	8.5	67090	61.8499	51645544	462056	19338700	3015177	826892	127086	2044.27	79825.1	SD	196438	194395	106570	20742	67083
	2006	110092	85900.8	26216	30.4	29.4	30.4	57.2	59.7	30.2	30.5	57.2	13.5	11.3	10.1	59.3	54.8	11.3	22.6	23.8	9.8	12.7	22.6	26.5	18.1	8.7	68349	62.0833	50675820	381782	21893209	3378116	1385784	152496	2055.63	79109.3	SD	196438	194395	106570	20859	66966
	2007	111836	87331.1	26199	30.9	30	30.9	57.9	60.1	30.7	31.1	57.9	13.9	11.5	10.4	60	55.6	11.6	23.2	24.3	10.1	13.1	23.1	27.1	18.6	8.9	69177	61.8556	52089356	403564	23512752	3515392	993943	124644	2071.84	80326	SD	196438	194395	106700	20846	66849
	2008	113662	88786.7	26181	31.5	30.5	31.5	58.7	60.6	31.2	31.7	58.7	14.3	12	10.8	60.6	56.4	12	23.7	24.8	10.4	13.5	23.7	27.7	19.2	9.1	75382	66.3213	51090720	444999	24320100	4019400	1122720	147529	2094.57	79968.6	SD	196438	194395	106615	21048	66732
	2009	115505	90259.6	26163	32	31	32	59.4	61.2	31.7	32.2	59.4	14.7	12.4	11.1	61.3	57.2	12.4	24.7	25.3	10.7	13.9	24.3	28.3	19.7	9.3	76116	65.8983	49492696	370595	20142816	4116161	1041350	130463	2126.73	81260	SD	196438	194395	106615	21165	66615
	2010	117319	91745.3	26141	32.5	31.5	32.5	60.1	61.7	32.2	32.8	60.1	15.1	12.7	11.5	62	58	12.7	24.9	25.8	11	14.3	24.9	28.9	20.3	9.5	81380	69.3665	50421620	475628	23301879	3676707	1156251	111126	2146.67	82004.8	SD	196438	194395	106615	21282	66498
	2011	119090	93243.1	26118	33	32	33	60.8	62.3	32.7	33.3	60.8	15.5	13.1	11.8	62.6	58.7	13.1	25.5	26.3	11.3	14.7	25.5	29.6	20.8	9.7	79224	66.5245	49735272	610304	17635417	3627511	567779	50582	2164.01	84009.2	SD	196438	194395	106615	21373.6	66406.4
	2012	120828	94753.1	26094	33.5	32.5	33.5	61.5	62.8	33.2	33.8	61.5	15.9	13.4	12.2	63.2	59.5	13.4	26	26.8	11.6	15.1	26	30.2	21.4	9.9	83416	69.0368	50946484	716356	22069254	3274337	1080857	84404	2107.85	83617.4	SD	196438	194395	106615	21465.2	66314.8
	2013	122536	96265.1	26067	34	32.9	34	62.1	63.3	33.7	34.3	62.1	16.3	13.7	12.5	63.9	60.2	13.7	26.6	27.3	11.9	15.5	26.6	30.8	22	10.2	85311	69.6212	61182076	585450	22663953	3357307	1294634	91049	2135.17	84469.2	SD	196438	194395	106858	21313.8	66223.2
	2014	124222	97765.7	26034	34.5	33.4	34.5	62.8	63.9	34.2	34.7	62.8	16.7	14.1	12.8	64.5	60.9	14.1	27.2	27.8	12.2	15.9	27.2	31.4	22.5	10.4	91980	74.0451	56672829	830129	23273257	3669814	1273957	93021	2165.98	85641.3	SD	196438	194395	106942	21337.4	66131.6
	2015	125891	99244.7	25991	35	33.9	35	63.5	64.4	34.7	35.2	63.5	17.1	14.4	13.1	65.1	61.6	14.4	27.8	28.3	12.5	16.3	27.8	32	23.1	SD	96508	76.66	55396061	SD	24694046	3710706	969146	84789	2246	90671.3	SD	196438	194395	106779	21627	66040
USA	1975	219205	161622	57817	18.9	18.6	18.9	40.8	41	18.9	18.8	40.8	6.1	5.5	5.3	37	44.9	5.5	11.7	11.9	5.6	5.4	11.7	13.3	10.1	SD	SD	SD	25713104	36069418	148361072	57886448	791152	9274504	8122.96	375002	18913700	962909	915896	430158	SD	SD
	1976	221239	163144	58331	19.3	19.1	19.3	41.4	41.6	19.4	19.3	41.4	6.4	5.8	5.5	37.5	45.5	5.8	12.1	12.2	5.8	5.7	12.1	13.6	10.4	SD	SD	SD	25509904	30649359	159751184	58481200	809023	7844501	7882.76	366790	20058600	962909	915896	430158	SD	SD
	1977	223324	164715	58862	19.8	19.5	19.8	41.9	42.2	19.9	19.7	41.9	6.6	6	5.8	38	46.1	6	12.4	12.6	6.1	6	12.4	13.9	10.8	SD	SD	SD	24339632	42155420	165234544	55671056	750918	10926515	7606.83	356024	18676100	962909	915896	430331	SD	SD
	1978	225450	166330	59409	20.3	20	20.3	42.5	42.8	20.3	20.2	42.5	6.9	6.3	6	38.6	46.7	6.3	12.7	13	6.3	6.2	12.7	14.3	11.1	SD	SD	SD	23583952	43945825	184613008	48322656	858870	8442730	7258.68	352555	20470600	962909	915896	428163	SD	SD
	1979	227600	167976	59966	20.8	20.5	20.8	43	43.4	20.8	20.7	43	7.3	6.6	6.3	39.1	47.4	6.6	13.1	13.3	6.6	6.5	13.1	14.6	11.4	SD	33192	14.5835	24069296	53836293	201383008	58080576	932220	7645730	6967.08	350803	20940700	962909	915896	428163	SD	SD
	1980	229763	169727	60449	21.3	21	21.3	43.7	44	21.4	21.2	43.7	7.6	6.9	6.6	39.7	48	6.9	13.5	13.7	6.9	6.9	13.5	15	11.8	4.9	34642	15.0773	24460288	42108884	168647008	64799504	1212400	6659370	7006.02	356599	21479900	962909	915896	428163	SD	SD
	1981	231939	171752	60690	21.8	21.5	21.8	44.3	44.7	21.9	21.7	44.3	7.9	7.2	6.9	40.3	48.7	7.2	13.9	14.1	7.2	7.2	13.9	15.4	12.2	4.9	34851	15.0259	24864128	47788465	206222000	75806304	1485560	7395810	7176.17	361062	19439000	962909	915896	428163	SD	SD
	1982	234133	173809	60934	22.4	22.1	22.4	45	45.3	22.5	22.3	45	8.3	7.5	7.2	40.9	49.5	7.5	14.3	14.6	7.5	7.6	14.3	15.9	12.6	5	34583	14.7707	27006752	51256072	209180000	75251296	1159500	8602000	7234.84	349171	16415900	962909	915896	431399	SD	SD
	1983	236344	175898	61182	23	22.7	23	45.7	46	23.1	23	45.7	8.7	7.9	7.6	41.6	50.2	7.9	14.8	15	7.8	8	14.8	16.3	13.1	5.1	36246	15.3361	25547104	38012834	106030000	65857904	703970	6916000	7202.43	347101	19767500	962909	915896	431399	SD	SD
	1984	238574	178022	61434	23.7	23.3	23.7	46.4	46.7	23.7	23.6	46.4	9.1	8.3	7.9	42.3	51	8.3	15.2	15.5	8.2	8.4	15.2	16.8	13.5	5.1	35787	15.0004	24802304	44151653	194880000	70618000	955720	6875200	7094.63	355015	19688200	962909	915896	431399	SD	SD
	1985	240824	180180	61690	24.3	24	24.3	47.2	47.4	24.3	24.3	47.2	9.5	8.7	8.3	43	51.9	8.7	15.8	16	8.5	8.9	15.8	17.3	14	5.2	36969	15.351	25594304	49181198	225453008	65975008	1011400	7526000	6899.25	343025	17830500	962909	915896	431399	SD	SD
	1986	243099	182377	61952	25	24.6	25	48	48.1	25	25	48	10	9.2	8.8	43.7	52.7	9.2	16.3	16.5	8.9	9.4	16.3	17.9	14.6	5.3	37184	15.2958	27498000	45017460	208943008	56897008	1041400	5588000	6654.73	331180	17285700	962909	915896	431399	SD	SD
	1987	245403	184614	62219	25.7	25.3	25.7	48.9	48.8	25.6	25.8	48.9	10.5	9.6	9.2	44.5	53.6	9.6	16.9	17	9.3	9.9	16.9	18.5	15.1	5.4	38532	15.7015	26506000	45734222	181142000	57361808	1180750	5424400	6446.56	324404	17792400	962909	915896	426948	SD	SD
	1988	247740	186883	62488	26.4	26	26.4	49.7	49.5	26.3	26.5	49.7	10.9	10.1	9.6	45.3	54.5	10.1	17.5	17.5	9.7	10.4	17.5	19	15.7	5.5	40368	16.2945	27128000	37309111	125194000	49320000	873300	3158000	6316.81	319075	17733100	962909	915896	426948	SD	SD
	1989	250113	189174	62758	27.2	26.8	27.2	50.6	50.2	27	27.3	50.6	11.4	10.5	10.1	46.1	55.4	10.5	18.1	18.1	10.2	10.9	18.1	19.7	16.3	5.6	46833	18.7247	26695008	44739845	191319008	55428000	1076330	5423000	6151.98	321555	18709200	962909	915896	426948	SD	SD
	1990	252530	191645	62862	27.9	27.5	27.9	51.4	50.9	27.7	28.1	51.4	12	11	10.6	47	56.3	11	18.7	18.7	10.6	11.5	18.7	20.3	17	5.8	47664	18.8746	25524000	45449498	201532000	74294000	1469000	5189000	6100.82	334893	18586900	962909	915896	426948	186498	302450
	1991	254975	194609	62468	28.7	28.3	28.7	52.3	51.7	28.4	29	52.3	12.5	11.6	11.1	47.8	57.2	11.6	19.4	19.3	11	12	19.4	20.9	17.7	5.9	48951	19.1984	27444000	47766569	189867780	53890000	1531600	3539490	6123.39	335695	18784000	962909	915896	426948	186389	302559
	1992	257454	197588	62065	29.5	29	29.5	53.2	52.4	29.1	29.8	53.2	13	12.1	11.6	48.6	58.1	12.1	20.1	19.9	11.5	12.6	20.1	21.6	18.4	6	50067	19.4469	27545008	51476638	240719220	67136000	1026000	4270720	6173.72	342360	18991000	962909	915896	425429	187800	302667
	1993	260020	200620	61670	30.3	29.8	30.3	54.1	53.2	29.9	30.7	54.1	13.6	12.6	12.1	49.5	59	12.6	20.8	20.6	12	13.2	20.8	22.3	19.1	6.2	53894	20.7269	28214000	44550238	160985760	65222000	991600	3000690	6246.36	346197	20349600	962909	915896	422948	190172	302776
	1994	262742	203772	61298	31.1	30.6	31.1	55	54	30.6	31.5	55	14.2	13.2	12.7	50.4	60	13.2	21.5	21.2	12.5	13.8	21.5	23.1	19.8	6.3	56692	21.5771	28058000	59648768	255294970	63168000	1313000	3321660	6334.53	351400	19297300	962909	915896	421139	191873	302884
	1995	265659	207080	60960	31.9	31.4	31.9	55.9	54.8	31.3	32.4	55.9	14.8	13.7	13.2	51	60.9	13.7	22.3	21.9	13	14.5	22.3	23.8	20.6	6.4	59254	22.3045	27938000	51683776	187969950	59404000	1392000	2338270	6419.17	352348	20038000	962909	915896	420139	192764	302993
	1996	268803	210572	60659	32.6	32.2	32.6	56.8	55.6	32	33.3	56.8	15.3	14.3	13.8	52.1	61.8	14.3	23	22.6	13.5	15.1	23	24.6	21.4	6.6	61767	22.9785	26727000	56146166	234517750	61982000	1266000	2224350	6445.86	356150	20310300	962909	915896	416306	196488	303102
	1997	272137	214216	60390	33.4	32.9	33.4	57.6	56.3	32.7	34.1	57.6	15.9	14.8	14.3	53	62.6	14.8	23.8	23.3	14	15.7	23.8	25.3	22.2	6.7	62636	23.0164	28751000	62790399	233864300	67536000	1332000	2427570	6339.69	354750	20165300	962909	915896	414885	197801	303210
	1998	275543	217931	60122	34.2	33.7	34.2	58.5	57.1	33.3	34.9	58.5	16.5	15.4	14.8	53.8	63.5	15.4	24.6	24.1	14.4	16.3	24.6	26.1	23	6.9	64751	23.4995	31486000	63894638	247882020	69327000	1379700	2406120	6230.73	353608	19773900	962909	915896	414588	197989	303319
	1999	278862	221595	59824	34.9	34.4	34.9	59.3	57.9	34	35.7	59.3	17.1	15.9	15.4	54.7	64.3	15.9	25.4	24.8	14.9	16.9	25.4	26.8	23.8	7	68399	24.5279	32022700	62208433	239548580	62567284	1500700	2113780	6191.4	337486	19563500	962909	915896	413887	198582	303427
	2000	281983	224993	59602	35.6	35.1	35.6	60.1	58.6	34.6	36.5	60.1	17.6	16.5	15.9	55.5	65.1	16.5	26.1	25.5	15.4	17.5	26.1	27.6	24.6	7.2	69301	24.5763	36114000	64397273	251853900	60639376	1203970	2165120	6146.01	344010	18795000	963203	916192	414399	198257	303536
	2001	284852	227822	59710	36.2	35.7	36.2	60.9	59.3	35.1	37.2	60.9	18.1	16.9	16.4	56.3	65.9	16.9	26.9	26.2	15.8	18	26.9	28.3	25.4	7.3	71372	25.0558	34587000	67872113	241376650	52999932	889495	1706990	6096.59	344462	19614400	963203	916192	414944	197468	303780
	2002	287507	230500	59770	36.8	36.3	36.8	61.7	60	35.7	37.9	61.7	18.6	17.4	16.8	57	66.6	17.4	27.7	26.9	16.2	18.5	27.7	29.1	26.2	7.5	73249	25.4773	35553000	63928196	227766880	43703968	1374929	1683760	6075.51	343838	19298400	963203	916192	413064	199104	304024
	2003	290028	233086	59797	37.4	36.9	37.4	62.4	60.7	36.1	38.6	62.4	19.1	17.8	17.2	57.8	67.3	17.8	28.4	27.6	16.6	19	28.4	29.8	27	7.6	74219	25.5903	33858000	57803354	256229020	63803256	1020220	2095710	6055.07	348508	SD	963203	916192	413925	197998	304269
	2004	292539	235671	59817	37.9	37.4	37.9	63.1	61.3	36.5	39.1	63.1	19.5	18.2	17.6	58.5	68	18.2	29.2	28.3	16.9	19.5	29.2	30.5	27.7	7.8	73138	25.0011	29013000	72734334	299875570	58697040	804809	1679310	6001.74	349996	SD	963203	916192	411521	200158	304513
	2005	295130	238319	59847	38.3	37.8	38.3	63.8	61.9	36.9	39.7	63.8	19.9	18.6	18	59.2	68.7	18.6	29.9	29	17.2	19.9	29.9	31.2	28.5	7.9	75119	25.4529	26606000	72265023	282262550	57241992	1205467	1667170	6035.22	348458	SD	963203	916192	411784	199651	304757
	2006	297827	241054	59889	38.7	38.2	38.7	64.4	62.5	37.2	40.2	64.4	20.2	18.9	18.3	59.8	69.3	18.9	30.6	29.7	17.5	20.3	30.6	31.8	29.2	8	72451	24.3265	29564000	73805780	267502850	49216040	1095652	1357470	6138.17	352071	SD	963203	916192	409215	201428	305550
	2007	300595	243848	59939	39.1	38.6	39.1	65.1	63.1	37.5	40.7	65.1	20.6	19.2	18.6	60.5	69.9	19.2	31.3	30.3	17.7	20.6	31.3	32.5	30	8.2	71390	23.7495	27750600	62416858	331177280	55820360	1160561	1312590	6137.04	355375	SD	963203	916192	412858	196992	306342
	2008	303374	246670	59987	39.5	38.9	39.5	65.7	63.7	37.8	41.1	65.7	20.9	19.5	18.9	61.1	70.5	19.5	32	31	18	21	32	33.2	30.7	8.3	70553	23.2561	25041020	67984997	305911450	68016096	1159290	1307090	6125.35	353791	SD	983151	914742	413313	194295	307135
	2009	306076	249468	60023	39.8	39.2	39.8	66.3	64.2	38	41.5	66.3	21.1	19.8	19.1	61.8	71.1	19.8	32.7	31.7	18.2	21.3	32.7	33.8	31.5	8.4	68771	22.4686	27607450	76064079	331921050	60365728	1150310	1321490	6045.93	348350	SD	983151	914742	409961	196854	307927
	2010	308641	252210	60038	40.1	39.5	40.1	66.9	64.8	38.2	41.9	66.9	21.4	20	19.4	62.4	71.7	20	33.4	32.3	18.4	21.6	33.4	34.5	32.2	8.5	69128	22.3975	24820574	76630588	315617920	60062408	1442470	1188140	6008.59	350169	SD	983151	914742	408426	197596	308720
	2011	311051	254889	60023	40.4	39.8	40.4	67.5	65.3	38.4	42.3	67.5	21.6	20.3	19.6	63	72.2	20.3	34	33	18.6	21.9	34	35.1	32.9	8.7	73831	23.736	26511598	70698412	312788890	54418808	902196	727580	5954.54	353094	SD	983151	914742	404669	201078	308995
	2012	313335	257523	59982	40.7	40.1	40.7	68	65.8	38.6	42.7	68	21.9	20.5	19.8	63.6	72.7	20.5	34.7	33.6	18.8	22.2	34.7	35.7	33.6	8.8	73932	23.5952	29235840	70576499	273192400	61677384	1448090	892470	5865.14	349783	SD	983151	914742	408706	196766	309270
	2013	315537	260129	59922	41	40.4	41	68.6	66.4	38.8	43.1	68.6	22.1	20.7	20.1	64.1	73.3	20.7	35.4	34.3	18.9	22.5	35.4	36.3	34.3	8.9	75578	23.9522	27905910	76018070	351271870	58104610	1114750	938280	5805.07	349293	SD	983151	914742	405842	199355	309545
	2014	317719	262734	59849	41.3	40.7	41.3	69.1	66.9	39	43.4	69.1	22.3	21	20.3	64.7	73.8	21	36	34.9	19.1	22.7	36	36.9	35	9.1	76488	24.0741	27600190	89025783	361091140	55147120	1311340	1019410	5728.03	349618	SD	983151	914742	407866	197056	309820
	2015	319929	265361	59767	41.5	41	41.5	69.6	67.4	39.2	43.8	69.6	22.5	21.2	20.5	65.2	74.3	21.2	36.7	35.6	19.3	23	36.7	37.6	35.7	SD	79535	24.8602	29140590	SD	345486340	55839540	1366270	1299600	6078.15	359977	SD	983151	914742	405862	198784	310095
BRAZIL	1975	107612	65785.3	42434	7.3	6.8	7.3	24.8	27.5	8.6	5.9	24.8	1.5	1	0.7	27.2	22.4	1	4.5	5.2	1	1	4.5	6.4	2.7	SD	SD	SD	91524560	8713265	16334516	1788180	2282466	41593	5685.23	194214	1977700	851577	835814	213416	SD	SD
	1976	110213	68418.3	42390	7.6	7.2	7.6	25.5	28.2	9	6.3	25.5	1.6	1.1	0.8	27.9	23	1.1	4.8	5.5	1.1	1	4.8	6.6	2.9	SD	SD	SD	103173456	9637519	17751072	3215745	1840315	38962	6203.39	212772	2528140	851577	835814	216007	SD	SD
	1977	112868	71124.1	42331	8	7.5	8	26.1	28.9	9.4	6.6	26.1	1.8	1.1	0.8	28.5	23.6	1.1	5	5.7	1.2	1.1	5	6.9	3	SD	SD	SD	120081696	10801711	19255936	2066039	2290007	37430	6533.56	222792	3208890	851577	835814	218550	SD	SD
	1978	115578	73907.7	42253	8.3	7.8	8.3	26.7	29.6	9.7	6.9	26.7	1.9	1.2	0.9	29.1	24.3	1.2	5.2	6	1.3	1.2	5.2	7.2	3.2	SD	SD	SD	129144944	8358213	13569401	2690888	2193977	53947	6511.78	221018	3222390	851577	835814	220039	SD	SD
	1979	118343	76766.9	42157	8.7	8.2	8.7	27.4	30.3	10.2	7.3	27.4	2	1.3	0.9	29.8	24.9	1.3	5.5	6.3	1.4	1.3	5.5	7.5	3.4	SD	9868	8.3385	138898880	8991715	16306380	2926764	2186343	57564	6661.44	226623	3567040	851577	835814	222513	SD	SD
	1980	121160	79700.4	42040	9.1	8.6	9.1	28	31.1	10.6	7.7	28	2.2	1.4	1	30.4	25.6	1.4	5.7	6.6	1.5	1.4	5.7	7.8	3.6	4	10485	8.65386	148650560	12892027	20372080	2701613	1968165	75609	7241.89	246341	4200520	851577	835814	224278	SD	SD
	1981	124031	82704.3	41907	9.6	8.9	9.6	28.7	31.8	11	8.1	28.7	2.4	1.5	1.1	31.1	26.3	1.5	6	6.9	1.6	1.5	6	8.2	3.8	4	11070	8.92519	155924112	12766529	21116912	2209631	2340947	98475	7410.56	249323	2752790	851577	835814	225824	SD	SD
	1982	126947	85776.2	41749	10	9.3	10	29.4	32.5	11.5	8.6	29.4	2.5	1.7	1.2	31.7	27	1.7	6.3	7.2	1.7	1.6	6.3	8.5	4	4.1	11834	9.32197	186646608	11092748	21842480	1826945	2902657	61469	7509.24	252419	2729080	851577	835814	228136	SD	SD
	1983	129882	88894.8	41561	10.5	9.8	10.5	30.1	33.3	11.9	9	30.1	2.7	1.8	1.3	32.4	27.8	1.8	6.6	7.6	1.9	1.7	6.6	8.9	4.3	4.1	12803	9.85738	216036960	12327061	18731216	2236700	1580546	92824	7546.35	250783	2286910	851577	835814	228821	SD	SD
	1984	132801	92034.5	41330	10.9	10.2	10.9	30.8	34	12.4	9.5	30	2.9	2	1.4	33.1	28.5	2	6.9	7.9	2	1.9	6.9	9.2	4.5	4.2	12608	9.49393	222317840	13257888	21164144	1983157	2625676	113529	7763.64	260043	3445380	851577	835814	229924	SD	SD
	1985	135676	95168.8	41054	11.4	10.7	11.4	31.6	34.8	12.9	10	31.6	3.2	2.1	1.5	33.8	29.3	2.1	7.2	8.3	2.2	2.1	7.2	9.6	4.8	4.3	13553	9.98922	247199472	15698413	22018176	4320267	2548738	166158	7819.9	261469	3203390	851577	835814	231041	SD	SD
	1986	138499	98293.3	40730	11.9	11.1	11.9	32.3	35.5	13.4	10.5	32.3	3.4	2.3	1.6	34.5	30.1	2.3	7.6	8.6	2.3	2.2	7.6	10	5.1	4.4	14551	10.5062	238443008	11553929	20541230	5638470	2219478	130382	8059.29	271002	3931000	851577	835814	234055	SD	SD
	1987	141273	101405	40363	12.4	11.6	12.4	33.1	36.3	13.8	11	33.1	4.6	2.5	1.8	35.2	30.9	2.5	7.9	9	2.5	2.4	7.9	10.4	5.4	4.5	15226	10.7777	268504000	14209236	26786650	6099111	2006055	166150	8267.85	278424	3887200	851577	835814	235791	SD	SD
	1988	144002	104500	39952	12.9	12	12.9	33.9	37	14.3	11.6	33.9	3.9	2.6	1.9	36	31.8	2.6	8.3	9.4	2.7	2.6	8.3	10.8	5.7	4.6	16437	11.4145	258294000	15307985	24749550	5745670	2802983	130792	8500.85	284432	3728240	851577	835814	237687	SD	SD
	1989	146692	107572	39507	13.5	12.5	13.5	34.7	37.8	14.8	12.1	34.7	4.2	2.8	2.1	36.7	32.7	2.8	8.7	9.8	2.8	2.8	8.7	11.3	6	4.6	17485	11.9195	252290000	19829068	26589870	5555184	2308355	228208	8776.72	292193	3362300	851577	835814	239432	SD	SD
	1990	149352	110623	39025	14	13	14	35.5	38.5	15.3	12.7	35.5	4.4	3	2.2	37.5	33.5	3	9.1	10.2	3	3.1	9.1	11.7	6.3	4.7	18374	12.3025	262674144	16583673	21347770	3093791	2234467	177760	8956.85	302553	3207800	851577	835814	241608	47501	546705
	1991	151977	113644	38510	14.5	13.5	14.5	36.3	39.3	15.7	13.3	36.3	4.7	3.2	2.4	38.2	34.4	3.2	9.5	10.6	3.2	3.3	9.5	12.2	6.7	4.8	18917	12.4473	260887893	12776660	23624340	2916823	2744711	230423	9259.82	312443	3386800	851577	835814	244941	46711.1	544162
	1992	154564	116635	37963	15	13.9	15	37.2	40	16.2	13.8	37.2	5	3.4	2.5	38.9	35.3	3.4	9.9	11	3.4	3.5	9.9	12.6	7	4.9	19910	12.8814	271474875	16103307	30506127	2795598	2797138	297361	9386.05	317898	3535540	851577	835814	246709	47486.2	541619
	1993	157133	119612	37399	15.5	14.4	15.5	38	40.8	16.6	14.4	38	5.4	3.6	2.7	39.7	36.2	3.6	10.3	11.4	3.6	3.7	10.3	13.1	7.4	5	21376	13.6038	244530708	18485921	30055633	2197354	2478325	262816	9414.24	319679	4450000	851577	835814	249463	47275.3	539076
	1994	159705	122609	36824	16	14.9	16	38.8	41.5	17.1	14.9	38.8	5.7	3.9	2.9	40.4	37.1	3.9	10.8	11.8	3.7	4	10.8	13.6	7.8	5.1	22375	14.0102	292101835	20397864	32487625	2096259	3369684	260995	9598.26	327040	5017800	851577	835814	251418	47863.4	536533
	1995	162297	125643	36248	16.5	15.4	16.5	39.6	42.2	17.5	15.5	39.6	6	4.1	3.1	41.1	38	4.1	11.2	12.2	3.9	4.2	11.2	14.1	8.2	5.2	23954	14.7594	303699497	21017426	36266951	1533871	2946168	180880	9780.88	332392	4205900	851577	835814	258472	43352.5	533990
	1996	164913	128723	35670	17	15.8	17	40.4	43	17.9	16.1	40.4	6.4	4.3	3.3	41.8	38.9	4.3	11.6	12.7	4.1	4.5	11.6	14.6	8.6	5.3	26256	15.9211	317105981	18885872	29652791	3292777	2452036	217426	9449.95	318191	5020000	851577	835814	259019	45348.6	531446
	1997	167545	131951	34975	17.5	16.3	17.5	41.2	43.7	18.3	16.7	41.2	6.7	4.5	3.5	42.6	39.8	4.5	12.1	13.1	4.3	4.7	12.1	15.1	9	5.4	27497	16.4117	331612687	21389162	32948044	2489070	2840243	228741	9638.4	325686	5839900	851577	835814	259566	47344.7	528903
	1998	170171	135207	34265	18	16.7	18	42	44.5	18.8	17.2	42	7.1	4.8	3.7	43.3	40.7	4.8	12.6	12.6	4.5	5	12.6	15.6	9.4	5.5	28284	16.621	345254972	25418381	29601753	2269847	2191153	207251	9742.11	335687	5851100	851577	835814	260112	49341.8	526360
	1999	172759	138458	33548	18.5	17.2	18.5	42.8	45.2	19.2	17.8	42.8	7.5	5	3.9	44	41.6	5	13	14.1	4.7	5.3	13	16.1	9.8	5.6	31616	18.3006	333847720	25288196	32239479	2461856	2830915	288058	9832.49	337486	5869770	851577	835814	260759	51237.9	523817
	2000	175288	141684	32821	19	17.7	19	43.7	46	19.6	18.5	43.7	7.8	5.3	4.1	44.7	42.6	5.3	13.5	14.5	4.9	5.6	13.5	16.6	10.3	5.7	35269	20.1206	326121011	26953821	32321000	1725792	3056289	214276	10142.9	341189	6568000	851577	835814	261406	53134	521274
	2001	177751	144323	32645	19.6	18.1	19.6	44.5	46.7	20	19.1	44.5	8.2	5.6	4.3	45.4	43.5	5.6	14	15	5.2	5.9	14	17.2	10.7	5.8	35059	19.7237	344292922	31182321	41962475	3366599	2453681	342476	10514.2	353761	6838000	851577	835814	263465	53983	518366
	2002	180151	146888	32506	20.1	18.6	20.1	45.3	47.4	20.4	19.8	45.3	8.6	5.9	4.5	46.2	44.4	5.9	14.5	15.5	5.4	6.3	14.5	17.7	11.2	6	36620	20.3274	364389416	34406567	35940832	3105660	3064230	298686	11024.8	374581	7682000	851577	835814	265868	54488	515458
	2003	182482	149406	32347	20.7	19.1	20.7	46.1	48.1	20.9	20.4	46.1	9	6.2	4.8	46.9	45.3	6.2	15	15.9	5.7	6.7	15	18.2	11.6	6.1	37484	20.5412	396012158	42186572	48327323	6153500	3302038	435092	11605.6	393249	SD	851577	835814	268469	54795	512550
	2004	184738	151847	32163	21.2	19.6	21.2	46.9	48.8	21.3	21.1	46.9	9.4	6.5	5	47.6	46.3	6.5	15.5	16.4	5.9	7.1	15.5	18.8	12.1	6.2	39242	21.2419	415205835	40853419	41787558	5818846	2967007	459526	12123.8	410787	SD	851577	835814	272132	54040	509642
	2005	186917	154190	31953	21.8	20.1	21.8	47.8	49.5	21.7	21.8	47.8	9.8	6.8	5.3	48.3	47.2	6.8	16	16.8	6.2	7.5	16	19.3	12.6	6.4	40311	21.5662	422956646	42143841	35113312	4658790	3021641	522428	12288.8	416335	SD	851577	835814	272433	56647.4	506734
	2006	189012	156421	31713	22.3	20.6	22.3	48.6	50.2	22.1	22.6	48.6	10.2	7.2	5.6	49	48.2	7.2	16.6	17.3	6.4	7.9	16.6	19.9	13.1	6.6	45043	23.8307	477410656	42872242	42661677	2484848	3457744	405657	12224.8	409196	SD	851577	835814	272784	57951.2	505079
	2007	191027	158549	31448	22.9	21.2	22.9	49.4	50.8	22.6	23.3	49.4	10.7	7.5	5.9	49.7	49.1	7.5	17.1	17.8	6.7	8.3	17.1	20.4	13.6	6.7	47714	24.9777	549707314	47521602	52112217	4114057	3169356	237801	11876.6	417531	SD	851577	835814	271638	60752.4	503424
	2008	192979	160601	31165	23.5	21.7	23.5	50.3	51.5	23	24	50.3	11.1	7.9	6.2	50.5	50.1	7.9	17.7	18.2	6.9	8.8	17.7	21	14.1	6.9	50189	26.0075	645300182	49122167	58933347	6027131	3461194	238516	12028.6	408903	SD	851577	835814	273500	60545.6	501768
	2009	194896	162618	30873	24.1	22.3	24.1	51.1	52.1	23.4	24.8	51.1	11.6	8.2	6.5	51.2	51	8.2	18.2	18.7	7.2	9.2	18.2	21.6	14.6	7.1	52102	26.7332	691606147	46756456	50719822	5055525	3486763	252503	12208.6	415523	SD	851577	835814	273540	62160.8	500113
	2010	196796	164631	30579	24.7	22.9	24.7	52	52.7	23.8	25.5	52	12.1	8.6	6.8	51.9	52	8.6	18.8	19.2	7.5	9.7	18.8	22.2	15.1	7.3	54874	27.8837	717463793	55809882	55364271	6171250	3158905	395056	12460.7	441213	SD	851577	835814	273463	63893	498458
	2011	198687	166651	30284	25.2	23.4	25.2	52.8	53.4	24.3	26.2	52.8	12.5	9	7.2	52.7	53	9	19.4	19.6	7.7	10.1	19.4	22.8	15.7	7.5	57873	29.1278	734006059	61287941	55660235	5690043	3435366	373009	12655.8	441820	SD	851577	835814	275373	62967	497474
	2012	200561	168662	29994	25.8	24	25.8	53.6	54	24.7	26.9	53.6	13	9.3	7.5	53.4	53.9	9.3	19.9	20.1	8	10.6	19.9	23.4	16.2	7.7	56754	28.2976	721077287	54205581	71072810	4418388	2794854	431024	12549.6	441363	SD	851577	835814	275607	63717	496490
	2013	202409	170651	29711	26.4	24.5	26.4	54.5	54.6	25.1	27.6	54.5	13.5	9.7	7.9	54.1	54.8	9.7	20.5	20.6	8.3	11	20.5	24	16.8	7.9	58014	28.6618	768090444	66255772	80273172	5738473	2892599	520397	12583.6	437769	SD	851577	835814	279562	60746	495506
	2014	204213	172604	29429	26.9	25.1	26.9	55.3	55.3	25.5	28.3	55.3	14	10	8.2	54.8	55.8	10	21.1	21.1	8.6	11.4	21.1	24.6	17.4	8.1	57863	28.3346	736108487	70529403	79881614	6261895	3294586	432136	12623.7	444506	SD	851577	835814	283579	57713	494522
	2015	205962	174508	29149	27.5	25.6	27.5	56.1	55.9	25.9	29	56.1	14.6	10.4	8.6	55.5	56.7	10.4	21.7	21.6	8.9	11.9	21.7	25.2	18	SD	59636	28.9548	750290277	SD	85284656	5508451	3088926	504957	13756.7	497689	SD	851577	835814	284083	58193	493538
ARGENTINA	1975	26067	21109.1	4961	17.2	15.9	17.2	39.7	39.8	17.9	16.5	39.7	7.1	5	3.8	41.6	37.7	5	11.1	11.2	4.5	5.4	11.1	13.3	8.9	SD	SD	SD	15600000	1272043	7700000	8570000	108700	432900	3484.98	109873	60300	278040	273669	128650	SD	SD
	1976	26477.2	21548.9	4935	17.6	16.3	17.6	40.3	40.4	18.3	17	40.3	7.4	5.1	3.9	42.1	38.4	5.1	11.5	11.5	4.6	5.6	11.5	13.6	9.3	SD	SD	SD	16100000	1561240	5855000	11582000	170500	530000	3568.65	112619	78229	278040	273669	128524	SD	SD
	1977	26878.6	21983.8	4906	18	16.6	18	40.9	41	18.6	17.4	40.9	7.6	5.3	4.1	42.6	39.2	5.3	11.8	11.8	4.8	5.8	11.8	14	9.6	SD	SD	SD	16000000	2350370	8300000	5653100	155000	570000	3718.04	116583	74305	278040	273669	128398	SD	SD
	1978	27277.7	22418.2	4875	18.4	17	18.4	41.6	41.6	19	17.9	41.6	7.8	5.5	4.2	43.2	39.9	5.5	12.1	12.1	5	6	12.1	14.3	9.9	SD	SD	SD	13600000	3661619	9700000	8469400	133000	676000	3518.42	111000	107075	278040	273669	128272	SD	SD
	1979	27684.5	22858	4843	18.8	17.3	18.8	42.2	42.2	19.3	18.4	42.2	8.1	5.7	4.4	43.7	40.7	5.7	12.5	12.5	5.1	6.3	12.5	14.6	10.3	SD	4560	16.4713	14120000	4400372	8700000	8317800	235000	522000	3466.07	109516	130082	278040	273669	128146	SD	SD
	1980	28105.9	23307.9	4812	19.3	17.7	19.3	42.9	42.8	19.7	18.9	42.9	8.4	5.9	4.5	44.2	41.4	5.9	12.9	12.8	5.3	6.6	12.9	15	10.6	6.9	4544	16.1674	17200000	4275448	6400000	7974700	146000	433000	3402.94	107295	115568	278040	273669	128020	SD	SD
	1981	28543.4	23786	4764	19.7	18.1	19.7	43.5	43.3	20.1	19.4	43.5	8.7	6.2	4.7	44.7	42.2	6.2	13.2	13.1	5.5	6.8	13.2	15.3	11	7	4825	16.9041	15500000	4109119	12900000	8369600	224000	339000	3320.6	105533	96475	278040	273669	127894	SD	SD
	1982	28994	24280.8	4708	20.2	18.5	20.2	44.1	43.9	20.5	19.9	44.1	8.9	6.4	4.9	45.2	42.9	6.4	13.6	13.5	5.7	7.1	13.6	15.7	11.3	7.1	4658	16.0654	15046000	4837588	9600000	15097700	254000	637000	3224.65	103304	106700	278040	273669	128769	SD	SD
	1983	29454.7	24783	4652	20.7	19	20.7	44.7	44.5	20.9	20.4	44.7	9.3	6.7	5.1	45.8	43.6	6.7	13.9	13.8	5.9	7.5	13.9	16	11.7	7.1	4945	16.7885	15070000	4945138	9000000	13111400	216500	593000	3285.99	104860	118500	278040	273669	128644	SD	SD
	1984	29920.9	25290.4	4596	21.2	19.4	21.2	45.3	45.1	21.3	21	45.3	9.6	7	5.3	46.3	44.3	7	14.3	14.2	6.1	7.8	14.3	16.4	12.1	7.2	5129	17.1419	15440000	7278412	9500000	13678600	191200	717000	3318.68	106410	158500	278040	273669	128517	SD	SD
	1985	30388.8	25800.8	4540	21.6	19.9	21.6	45.9	45.7	21.7	21.6	45.9	9.9	7.2	5.5	46.8	45	7.2	14.7	14.6	6.3	8.1	14.7	16.8	12.5	7.3	4833	15.9039	14105000	7335264	11900000	8742800	198300	400000	3290.8	105172	162600	278040	273669	128391	SD	SD
	1986	30857.2	26314.1	4482	22.1	20.3	22.1	46.5	46.3	22.1	22.1	46.5	10.2	7.5	5.8	47.3	45.7	7.5	15.1	15	6.5	8.4	15.1	17.1	12.9	7.4	4688	15.1925	14465000	8078411	12100000	8756500	210500	495000	3211	102703	151144	278040	273669	128265	SD	SD
	1987	31326.5	26830	4425	22.6	20.8	22.6	47.1	46.9	22.5	22.7	47.1	10.6	7.7	6	47.8	46.4	7.7	15.5	15.4	6.7	8.7	15.5	17.5	13.3	7.5	5407	17.2602	14479000	7003237	9250000	9101200	134200	718000	3121.42	99706.7	167900	278040	273669	127939	SD	SD
	1988	31795.5	27347.2	4366	23	21.3	23	47.7	47.5	22.9	23.2	47.7	10.9	8	6.3	48.3	47.2	8	15.8	15.8	6.9	9	15.8	17.9	13.7	7.5	6032	18.9712	13939000	9927569	9200000	8596900	172300	450000	3191.63	101808	162500	278040	273669	127380	SD	SD
	1989	32263.6	27863.6	4307	23.5	21.7	23.5	48.3	48.1	23.2	23.8	48.3	11.3	8.2	6.5	48.7	47.9	8.2	16.2	16.2	7.1	9.3	16.2	18.3	14.1	7.6	5964	18.4853	13700000	7203154	4900000	10055700	124800	667000	3213.04	102088	153100	278040	273669	127470	SD	SD
	1990	32729.7	28378.3	4247	23.9	22.2	23.9	48.9	48.7	23.5	24.3	48.9	11.7	8.5	6.7	49.2	48.6	8.5	16.6	16.6	7.2	9.7	16.6	18.6	14.5	7.7	5603	17.119	15700000	10978206	5400000	10055700	207845	695000	3223.3	106190	165500	278040	273669	127565	111311	34793
	1991	33193.9	28883.8	4191	24.4	22.6	24.4	49.4	49.3	23.9	24.8	49.4	12	8.7	7	49.6	49.2	8.7	17	17	7.4	10	17	19	14.9	7.8	6015	18.1208	18200000	11122181	7684800	11036600	241578	610000	3189.83	105124	167300	278040	273669	127660	111509	34499.7
	1992	33655.2	29344.7	4176	24.8	23	24.8	50	49.9	24.2	25.4	50	12.4	9	7.2	50.1	49.9	9	17.4	17.4	7.6	10.3	17.4	19.4	15.3	7.9	6227	18.5024	16800000	11191344	10700500	9998500	212270	600200	3212.88	106634	248200	278040	273669	127755	111708	34206.4
	1993	34110.9	29802.3	4160	25.2	23.3	25.2	50.5	50.5	24.5	25.9	50.5	12.8	9.2	7.4	50.5	50.5	9.2	17.8	17.8	7.8	10.6	17.8	19.7	15.7	7.9	6834	20.0346	14250000	10463941	10901000	9995900	165640	436540	3160.07	104937	293900	278040	273669	127850	111906	33913.1
	1994	34558.1	30257.5	4142	25.6	23.7	25.6	51	51.1	24.8	26.4	51	13.1	9.5	7.6	50.8	51.2	9.5	18.2	18.2	7.9	11	18.2	20.1	16.1	8	7112	20.5798	15200000	11548583	10360000	9736500	198476	357286	3183.44	106457	462000	278040	273669	127948	112101	33619.8
	1995	34994.8	30710.3	4123	26	24.1	26	51.5	51.7	25.1	27	51.5	13.5	9.8	7.8	51.2	51.8	9.8	18.5	18.6	8.1	11.3	18.5	20.4	16.5	8.1	7361	21.0345	17700000	12839837	11404041	11406460	237675	260280	3145.03	105893	524700	278040	273669	128045	112298	33326.5
	1996	35419.7	31161.4	4103	26.5	24.5	26.5	52	52.2	25.4	27.5	52	13.8	10	8.1	51.6	52.4	10	18.9	19.1	8.3	11.7	18.9	20.7	17	8.2	6741	19.0318	17600000	13108969	10518290	9542315	218313	309500	3036.83	103769	855200	278040	273669	128142	112494	33033.2
	1997	35834	31609.2	4082	27	24.9	27	52.5	52.8	25.7	28.2	52.5	14.2	10.4	8.4	52	53.1	10.4	19.3	19.5	8.6	12.1	19.3	21.1	17.4	8.2	7137	19.9169	19450000	11705887	15536820	16106700	268519	512100	2990.08	103442	809600	278040	273669	128235	112694	32739.9
	1998	36241.6	32050.5	4059	27.5	25.4	27.5	53	53.3	26.1	28.8	53	14.6	10.7	8.6	52.3	53.7	10.7	19.7	19.9	8.8	12.5	19.7	21.4	17.8	8.3	8060	22.2396	19400000	18009449	19360656	15086820	303245	383395	2880.79	100747	775500	278040	273669	128330	112892	32446.6
	1999	36648.1	32480.5	4034	28	25.9	28	53.5	53.9	26.4	29.5	53.5	14.9	11	8.9	52.7	54.4	11	20.1	20.3	9	12.9	20.1	21.8	18.2	8.4	8802	24.0176	16700000	19511275	13504100	12600600	340494	554708	2941.98	102760	823500	278040	273669	128412	113104	32153.3
	2000	37057.5	32896.1	4007	28.4	26.4	28.4	54	54.4	26.7	30.1	54	15.3	11.3	9.2	53.1	55	11.3	20.5	20.7	9.2	13.3	20.5	22.2	18.7	8.5	8861	23.9115	18400000	19085800	16780650	15478660	297157	644150	2919.53	105151	862983	278040	273669	128510	113299	31860
	2001	37471.5	33295.8	3978	28.9	26.8	28.9	54.6	54.9	27.1	30.7	54.6	15.7	11.6	9.5	53.5	55.7	11.6	20.9	21.2	9.4	13.8	20.9	22.6	19.2	8.5	8973	23.9462	18720000	23061913	15359397	16146620	262985	664760	2928.56	109268	861991	278040	273669	128606	113538	31525.2
	2002	37889.4	33683.8	3944	29.4	27.3	29.4	55.1	55.5	27.3	31.4	55.1	16.1	11.9	9.8	53.9	56.4	11.9	21.4	21.6	9.6	14.2	21.4	23	19.6	8.6	8581	22.6475	19250000	25723006	14712079	15427820	278100	487510	3098.45	109280	739526	278040	273669	128710	113769	31190.4
	2003	38309.4	34063.4	3907	29.9	27.7	29.9	55.7	56	27.6	32	55.7	16.5	12.2	10.1	54.4	57.2	12.2	21.8	22.1	9.8	14.6	21.8	23.4	20.1	8.7	9132	23.8375	22050000	29414525	15044529	12399040	215550	331994	3321.31	118247	SD	278040	273669	130884	111930	30855.6
	2004	38728.7	34439.2	3870	30.3	28.2	30.3	56.3	56.6	27.9	32.7	56.3	16.8	12.5	10.4	54.8	57.9	12.5	22.3	22.5	10	15	22.3	23.8	20.6	8.8	9237	23.8505	20900000	26681328	14950825	14710175	151278	536091	3382.17	116814	SD	278040	273669	134345	108803	30520.8
	2005	39145.5	34815.5	3832	30.8	28.6	30.8	56.9	57.1	28.2	33.3	56.9	17.2	12.9	10.7	55.3	58.6	12.9	22.8	23	10.2	15.4	22.8	24.3	21.1	8.9	8963	22.8966	24400000	32335129	20482572	16139170	169257	226910	3396.41	116989	SD	278040	273669	137798	105686	30186
	2006	39558.9	35193.8	3795	31.3	29.1	31.3	57.5	57.6	28.5	34	57.5	17.6	13.2	11	55.7	59.3	13.2	23.2	23.4	10.4	15.9	23.2	24.7	21.7	9	8312	21.0117	26450000	34091340	14445538	12721976	322775	242960	3472.22	119537	SD	278040	273669	141104	102697	29868
	2007	39970.2	35573.4	3758	31.8	29.6	31.8	58	58.2	28.8	34.7	58	18.1	13.5	11.3	56.2	60	13.5	23.7	23.9	10.6	16.3	23.7	25.2	22.2	9.1	8766	21.9313	23960000	39601065	21755364	14662945	328249	472420	3497.13	122078	SD	278040	273669	144033	100086	29550
	2008	40382.4	35955.2	3721	32.3	30.1	32.3	58.6	58.7	29.1	35.3	58.6	18.5	13.9	11.6	56.7	60.7	13.9	24.2	24.4	10.8	16.8	24.2	25.6	22.7	9.3	7684	19.0281	26960000	39129223	22016926	16486532	336779	290525	3431.58	119752	SD	278040	273669	144261	100176	29232
	2009	40799.4	36339.5	3684	32.8	30.6	32.8	59.2	59.2	29.4	36	59.2	18.9	14.2	11.9	57.1	61.5	14.2	24.7	24.8	11	17.3	24.7	26.1	23.3	9.4	7643	18.7331	26960000	26094852	13121380	8508156	312998	181990	3252.56	110661	SD	278040	273669	143792	100963	28914
	2010	41223.9	36726.6	3648	33.3	31.1	33.3	59.8	59.7	29.7	36.7	59.8	19.3	14.6	12.3	57.6	62.2	14.6	25.3	25.3	11.3	17.7	25.3	26.6	23.8	9.6	8031	19.4814	18889878	43168131	22663095	9016373	338120	660200	2940.9	104568	SD	278040	273669	147481	97592	28596
	2011	41656.9	37117.4	3611	33.8	31.5	33.8	60.4	60.2	30	37.4	60.4	19.7	14.9	12.6	58.1	62.9	14.9	25.8	25.8	11.5	18.2	25.8	27.1	24.4	9.7	8033	19.2837	19806890	40983058	23799830	16067929	332782	414990	2886.81	104792	SD	278040	273669	148281	97088.8	28299.2
	2012	42096.7	37510.5	3576	34.3	32	34.3	61	60.7	30.4	38.1	61	20.1	15.3	12.9	58.5	63.6	15.3	26.3	26.3	11.8	18.7	26.3	27.6	25	9.9	7916	18.8043	19766388	33864490	21196637	14683475	361153	495940	2995.16	106418	SD	278040	273669	149254	96412.6	28002.4
	2013	42539.9	37903.6	3543	34.8	32.5	34.8	61.6	61.2	30.7	38.8	61.6	20.5	15.7	13.3	59	64.3	15.7	26.9	26.8	12.1	19.2	26.9	28.1	25.5	10.1	7970	18.7353	23700000	41064479	32119211	8134409	96109	444820	3057.85	109435	SD	278040	273669	149199	96764.4	27705.6
	2014	42981.5	38293.3	3510	35.4	33	35.4	62.2	61.8	31.1	39.5	62.2	20.9	16.1	13.7	59.5	65	16.1	27.4	27.3	12.3	19.7	27.4	28.6	26.1	10.2	8121	18.8942	24518477	43937975	33087165	14143425	429832	524715	3090.41	112223	SD	278040	273669	148700	97560.2	27408.8
	2015	43417.8	38677.4	3477	35.9	33.6	35.9	62.8	62.3	31.5	40.2	62.8	21.3	16.5	14	60	65.7	16.5	28	27.8	12.6	20.2	28	29.1	26.8	SD	9156	21.0881	22540010	SD	33817744	11571228	604817	524716	4365.57	125468	SD	278040	273669	148700	97857	27112
CHINA	1975	941655	169599	764655	1.2	1	1.2	9.1	9.9	1.3	1.2	9.1	0.3	0.1	0.1	10	8.3	0.1	0.4	0.5	0.1	0.2	0.4	0.7	0.2	SD	SD	SD	24565424	10523036	47357880	45313042	1725480	900000	5081.17	390408	6851600	960000	942469	401637	SD	SD
	1976	958143	173470	777131	1.3	1.1	1.3	9.4	10.2	1.3	1.2	9.4	0.3	0.2	0.1	10.2	8.5	0.2	0.5	0.5	0.1	0.2	0.5	0.7	0.2	SD	SD	SD	25610645	9341158	48264215	50386232	1679716	900000	5074.38	392778	6420000	960000	942469	407590	SD	SD
	1977	973487	177131	788333	1.4	1.2	1.4	9.6	10.4	1.4	1.3	9.6	0.3	0.2	0.1	10.5	8.8	0.2	0.5	0.5	0.1	0.2	0.5	0.7	0.2	SD	SD	SD	29053866	9910230	49495001	41076295	1639377	700000	4945.21	400890	9133300	960000	942468	413532	SD	SD
	1978	988046	183724	795640	1.4	1.3	1.4	9.9	10.7	1.5	1.4	9.9	0.3	0.2	0.1	10.8	9	0.2	0.5	0.6	0.1	0.2	0.5	0.8	0.3	SD	SD	SD	29394391	10981033	56057169	53842395	1709526	855000	4899.72	412049	10861000	960000	942468	419396	SD	SD
	1979	1.00233e+06	193667	799388	1.5	1.3	1.5	10.2	11	1.6	1.5	10.2	0.3	0.2	0.1	11.1	9.3	0.2	0.5	0.6	0.1	0.3	0.5	0.8	0.3	SD	SD	SD	31186369	11586982	60138515	62732521	1739592	917000	4961.78	422986	13081800	960000	942468	424113	SD	SD
	1980	1.01675e+06	204096	803029	1.6	1.4	1.6	10.4	11.3	1.7	1.6	10.4	0.4	0.2	0.1	11.3	9.6	0.2	0.6	0.6	0.1	0.3	0.6	0.9	0.3	3.6	SD	SD	31977589	12860653	62715141	55212839	1752443	877000	5081.35	437893	15334700	960000	942468	428519	SD	SD
	1981	1.03127e+06	214999	806607	1.8	1.5	1.8	10.7	11.7	1.8	1.7	10.7	0.4	0.2	0.1	11.6	9.9	0.2	0.6	0.7	0.1	0.3	0.6	0.9	0.3	3.6	SD	SD	38379599	15747756	59306226	59642710	1750879	1000000	5103.48	432114	15152500	960000	942468	433818	SD	SD
	1982	1.04591e+06	226416	810036	1.9	1.7	1.9	11.1	12	1.9	1.9	11.1	0.5	0.2	0.1	12	10.2	0.2	0.6	0.7	0.1	0.3	0.6	0.9	0.4	3.6	SD	SD	45486381	16946587	60678419	68472314	1749023	888000	5179.34	439292	16395500	960000	942467	443418	SD	SD
	1983	1.06115e+06	236778	815285	2	1.8	2	11.4	12.4	2	2.1	11.4	0.5	0.2	0.1	12.3	10.5	0.2	0.7	0.8	0.1	0.4	0.7	1	0.4	3.6	SD	SD	38624178	17744601	68405449	81391570	1744141	908000	5332.47	456592	18633300	960000	942467	453831	SD	SD
	1984	1.0776e+06	247769	821137	2.2	2	2.2	11.7	12.8	2.2	2.2	11.7	0.6	0.3	0.1	12.6	10.9	0.3	0.7	0.8	0.1	0.4	0.7	1.1	0.4	3.7	SD	SD	46470036	19937216	73650192	87817368	1836122	940000	5360.24	467494	20062400	960000	942467	465438	SD	SD
	1985	1.09561e+06	259451	827785	2.4	2.1	2.4	12.1	13.2	2.3	2.5	12.1	0.6	0.3	0.2	13	11.3	0.3	0.8	0.9	0.2	0.4	0.8	1.1	0.5	3.7	SD	SD	58711259	20158790	64102307	85807133	1630639	890000	5534.46	459852	17279000	960000	942467	477244	SD	SD
	1986	1.11546e+06	272003	835274	2.6	2.3	2.6	12.5	13.6	2.5	2.7	12.5	0.7	0.3	0.2	13.4	11.7	0.3	0.8	0.9	0.2	0.5	0.8	1.2	0.5	3.8	SD	SD	56483312	20086999	71177305	90043693	1523278	700000	5784	470619	17323200	960000	942467	483353	SD	SD
	1987	1.1368e+06	285403	843348	2.8	2.5	2.8	12.9	14.1	2.7	3	12.9	0.8	0.4	0.2	13.8	12.1	0.4	0.9	1	0.2	0.5	0.9	1.3	0.5	3.9	SD	SD	52811505	21873289	79601782	85904702	1475771	780000	6085.62	503291	22687800	960000	942467	488661	SD	SD
	1988	1.15867e+06	299339	851427	3.1	2.7	3.1	13.3	14.5	2.9	3.3	13.3	0.9	0.4	0.2	14.2	12.5	0.4	1	1.1	0.2	0.6	1	1.3	0.6	3.9	SD	SD	56062396	20136964	77723756	85432957	1690742	800000	6238.2	518483	25321900	960000	942467	494279	SD	SD
	1989	1.17969e+06	313504	858588	3.4	2.9	3.4	13.8	15	3.1	3.6	13.8	1	0.5	0.3	14.6	13	0.5	1	1.2	0.3	0.7	1	1.4	0.7	4	SD	SD	55645250	18682484	79310405	90810047	1317811	770000	6519.86	536169	25428200	960000	942467	500388	SD	SD
	1990	1.19888e+06	327700	864115	3.7	3.2	3.7	14.2	15.4	3.4	4	14.2	1.2	0.6	0.3	15	13.5	0.6	1.1	1.2	0.3	0.8	1.1	1.5	0.7	4.1	SD	SD	63451067	21517867	97213883	98231940	1816720	890000	6662.63	551461	27273700	960000	942467	506592	278734	157141
	1991	1.21591e+06	343030	866625	4.1	3.5	4.1	14.7	15.9	3.7	4.5	14.7	1.3	0.7	0.3	15.5	14	0.7	1.2	1.3	0.4	0.9	1.2	1.6	0.8	4.2	SD	SD	72694722	22037062	99147826	95953581	1631328	1000000	6874.55	561278	29659100	960000	942467	512271	271069	159127
	1992	1.231e+06	358275	867501	4.5	3.9	4.5	15.3	16.4	4	5	15.3	1.5	0.8	0.4	16	14.6	0.8	1.3	1.4	0.5	1.1	1.3	1.7	0.9	4.3	SD	SD	78868253	21384140	95772877	101591334	1540071	1300000	6951.36	566171	29202000	960000	942467	515198	266156	161113
	1993	1.24439e+06	373498	866760	5	4.2	5	15.8	16.9	4.4	5.6	15.8	1.7	0.9	0.5	16.5	15.2	0.9	1.4	1.5	0.5	1.3	1.4	1.8	0.9	4.4	SD	SD	68997110	24903776	103109999	106394921	1260385	1045500	7121.95	553463	25079300	960000	942467	519106	260262	163099
	1994	1.2565e+06	388789	864551	5.5	4.7	5.5	16.4	17.4	4.8	6.2	16.4	1.9	1.1	0.5	17	15.9	1.1	1.5	1.6	0.6	1.5	1.5	1.9	1	4.5	58609	4.66447	66430371	27014155	99674118	99301440	1511453	1200000	7431.82	572742	28842000	960000	942467	523713	253669	165085
	1995	1.26769e+06	404165	861065	6	5.1	6	17.1	17.9	5.2	6.8	17.1	2.1	1.2	0.6	17.6	16.6	1.2	1.6	1.7	0.7	1.7	1.6	2	1.1	4.6	75949	5.99111	70279210	26960958	112361571	102211429	1440976	1004000	8059.82	630283	35580200	960000	942472	523714	251687	167071
	1996	1.27798e+06	419602	856295	6.6	5.6	6.6	17.7	18.5	5.6	7.5	17.7	2.4	1.4	0.7	18.2	17.3	1.4	1.7	1.8	0.8	1.9	1.7	2.2	1.2	4.8	71556	5.59914	72571248	26000907	127865412	110569193	1543174	1098000	8687.07	670903	35984000	960000	942471	523752	249662	169057
	1997	1.28731e+06	435008	850331	7.1	6.2	7.1	18.4	19	6	8.2	18.4	2.6	1.5	0.9	18.8	18	1.5	1.8	1.9	0.9	2.1	1.8	2.3	1.4	5	63191	4.90877	83009189	27477764	104647617	123290085	1312210	1150000	7321.83	607456	35646700	960000	942471	524205	247223	171043
	1998	1.29592e+06	450485	843373	7.7	6.7	7.7	19.1	19.6	6.4	9	19.1	3	1.7	1	19.4	18.8	1.7	2	2.1	1	2.3	2	2.5	1.5	5.2	81999	6.32747	87204123	27995279	133197612	109726066	1577197	1040000	8020.53	627139	35830000	960000	942471	524549	244893	173029
	1999	1.30412e+06	466108	835743	8.3	7.3	8.3	19.8	20.2	6.8	9.7	19.8	3.3	1.9	1.1	20	19.6	1.9	2.1	2.2	1.1	2.6	2.1	2.7	1.6	5.4	106777	8.18769	78108190	28125360	128287195	113880088	1679352	883000	8232.99	646234	36439000	960000	942471	523995	243461	175015
	2000	1.31213e+06	481976	827656	9	7.9	9	20.5	20.8	7.2	10.6	20.5	3.7	2.1	1.3	20.6	20.4	2.1	2.3	2.4	1.2	2.8	2.3	2.8	1.8	5.6	117239	8.93501	71298530	31208354	106178315	99636127	1658498	1012000	8411.59	634034	34217900	960000	942470	522861	242608	177000
	2001	1.32008e+06	500574	816748	9.6	8.5	9.6	21.2	21.4	7.7	11.4	21.2	4.2	2.3	1.5	21.2	21.2	2.3	2.5	2.5	1.3	3.1	2.5	3	1.9	5.8	83624	6.33475	77965689	31775150	114255995	93873234	1806540	790000	8233.06	624468	35345600	960000	942470	520771	241490	180209
	2002	1.328e+06	520854	804094	10.3	9.2	10.3	21.9	22	8.2	12.3	21.9	4.7	2.5	1.6	21.8	22	2.5	2.6	2.7	1.4	3.4	2.6	3.2	2.1	6	71560	5.38856	92202631	32312255	120188915	90290262	2058366	493000	7962.03	632971	39604700	960000	942470	519387	239665	183418
	2003	1.33589e+06	541559	791046	11.1	9.8	11.1	22.6	22.7	8.7	13.2	22.6	5.3	2.7	1.8	22.5	22.8	2.7	2.8	2.8	1.6	3.8	2.8	3.4	2.3	6.2	94814	7.09742	92039100	31094737	115997909	86488264	2079799	654000	7894.18	623081	SD	960000	942470	516984	238859	186627
	2004	1.34374e+06	562733	777629	11.9	10.5	11.9	23.4	23.4	9.2	14.3	23.4	5.9	3	2	23.1	23.6	3	3	3	1.8	4.2	3	3.6	2.5	6.5	82798	6.16174	91044450	35613775	130434297	91952238	1758489	600000	7911.85	640586	SD	960000	942470	517276	235359	189835
	2005	1.35154e+06	584313	763957	12.8	11.3	12.8	24.1	24.1	9.8	15.4	24.1	6.6	3.4	2.3	23.7	24.5	3.4	3.2	3.2	2	4.6	3.2	3.8	2.7	6.7	69819	5.1659	87578212	34222321	139498473	97445196	1806862	700000	7917.28	648140	SD	960000	942470	518273	231153	193044
	2006	1.35929e+06	605766	750612	13.8	12.2	13.8	24.9	24.8	10.5	16.7	24.9	7.4	3.8	2.6	24.4	25.4	3.8	3.5	3.4	2.2	5.2	3.5	4	2.9	7	61589	4.53097	97806457	32417654	151731441	108466271	1558532	350000	7801.95	650693	SD	960000	942470	514969	232944	194557
	2007	1.36704e+06	627339	737365	14.9	13.2	14.9	25.7	25.5	11.3	18.1	25.7	8.2	4.3	2.9	25	26.3	4.3	3.7	3.7	2.5	5.8	3.7	4.3	3.1	7.3	58735	4.29652	113731417	30862416	152418870	109298296	1531913	643000	7467.22	643474	SD	960000	942470	515400	231000	196070
	2008	1.3748e+06	649336	723882	16.1	14.2	16.1	26.5	26.2	12.1	19.6	26.5	9	4.8	3.3	25.7	27.2	4.8	3.9	3.9	2.8	6.6	3.9	4.5	3.4	7.6	61431	4.46836	124917902	34748061	166032097	112464292	1707885	600000	7544.9	654819	SD	960000	942470	515377	229509	197584
	2009	1.38259e+06	671635	710221	17.4	15.3	17.4	27.3	27	13	21.3	27.3	9.9	5.5	3.7	26.4	28.1	5.5	4.2	4.1	3.2	7.4	4.2	4.8	3.7	7.8	62332	4.50834	116250972	34413612	164107560	115115364	1489135	580000	7525.88	662600	SD	960000	942470	515374	227999	199097
	2010	1.39042e+06	694257	696294	18.9	16.6	18.9	28.1	27.8	14	23.1	28.1	10.9	6.2	4.2	27.1	29.1	6.2	4.5	4.4	3.7	8.4	4.5	5.1	4	8.1	61572	4.4283	111501183	34203217	177540788	115186178	1338693	525000	7623.52	672588	SD	960000	942470	515368	226491	200610
	2011	1.39828e+06	717150	682144	20.4	17.9	20.4	29	28.5	15.1	25	29	11.9	7	4.8	27.9	30.2	7	4.8	4.7	4.1	9.4	4.8	5.4	4.3	8.4	57882	4.13951	115123160	34976622	192904232	117414034	1215298	740000	7547.4	671627	SD	960000	942470	515366	224951	202152
	2012	1.40613e+06	739846	668196	21.9	19.2	21.9	30	29.3	16.2	27	30	13	7.8	5.4	28.6	31.2	7.8	5.1	5	4.7	10.5	5.1	5.7	4.6	8.8	50447	3.58764	123691417	34889728	205719284	121030059	1126098	632500	7431.37	674589	SD	960000	942470	515361	223414	203695
	2013	1.41386e+06	762188	654478	23.6	20.6	23.6	30.9	30	17.3	29	30.9	14.1	8.7	6.1	29.4	32.3	8.7	5.5	5.2	5.3	11.7	5.5	6	5	9.1	49430	3.49611	128735138	33918693	218621905	121930527	1013858	600000	7434.06	677324	SD	960000	942470	515358	221875	205237
	2014	1.42131e+06	784074	640927	25.2	22.1	25.2	31.9	30.8	18.5	31	31.9	15.2	9.7	6.9	30.2	33.5	9.7	5.8	5.5	5.9	13	5.8	6.4	5.4	9.4	47046	3.31005	126153469	34117327	215812104	126215211	1061769	500000	7477.76	679251	SD	960001	942470	515358	220333	206779
	2015	1.42836e+06	805387	627525	26.9	23.7	26.9	32.9	31.6	19.7	33.1	32.9	16.3	10.7	7.7	31	34.6	10.7	6.2	5.9	6.5	14.3	6.2	6.7	5.8	SD	47324	3.31317	117632911	SD	224795307	130192335	1112765	1261221	7623.52	709851	SD	960001	942470	528635	205514	208321
INDIA	1975	621302	132732	489500	0.3	0.3	0.3	4.9	5.3	0.4	0.3	4.9	0.1	0	0	5.7	4.2	0	0.3	0.3	0	0	0.3	0.5	0.2	SD	SD	SD	144288896	6464569	7255800	24104400	2767400	0	9444.58	389802	3493800	328726	297319	179694	SD	SD
	1976	635772	138059	498825	0.3	0.3	0.3	5.1	5.5	0.4	0.3	5.1	0.1	0	0	5.9	4.3	0	0.3	0.4	0	0	0.3	0.5	0.2	SD	SD	SD	140603504	5589653	6361200	28846304	2463300	0	9569.71	389229	3416800	328726	297319	179649	SD	SD
	1977	650485	143594	508341	0.4	0.4	0.4	5.2	5.7	0.4	0.3	5.2	0.1	0	0	6.1	4.5	0	0.4	0.4	0	0.1	0.4	0.5	0.2	SD	SD	SD	153007008	5810300	5973300	29009904	2746500	0	9664.71	400069	4295800	328726	297319	179591	SD	SD
	1978	665502	149344	517995	0.4	0.4	0.4	5.4	5.9	0.5	0.3	5.4	0.1	0	0	6.3	4.6	0	0.4	0.4	0	0.1	0.4	0.6	0.2	SD	SD	SD	176965008	6175005	6199000	31749200	2550600	0	9816.68	408868	5131000	328726	297319	180592	SD	SD
	1979	680916	155295	527737	0.4	0.4	0.4	5.6	6.1	0.5	0.4	5.6	0.1	0	0	6.5	4.8	0	0.4	0.4	0	0.1	0.4	0.6	0.2	SD	SD	SD	151655104	5947106	5602900	35507808	1986400	0	10031.7	412740	5272900	328726	297319	180580	SD	SD
	1980	696784	161446	537520	0.5	0.5	0.5	5.8	6.3	0.5	0.4	5.8	0.1	0	0	6.8	4.9	0	0.4	0.5	0	0.1	0.4	0.7	0.2	3.1	SD	SD	128833408	5478980	6957000	31830000	2751600	0	10197.6	421259	5532600	328726	297319	180272	SD	SD
	1981	713118	167454	547651	0.5	0.5	0.5	6	6.6	0.6	0.4	6	0.1	0	0	7	5.1	0	0.5	0.5	0	0.1	0.5	0.7	0.2	3.2	SD	SD	154248000	7074645	6897100	36312608	2943900	0	10370.3	430870	6084600	328726	297319	180401	SD	SD
	1982	729868	172966	558477	0.5	0.5	0.5	6.2	6.8	0.6	0.5	6.2	0.1	0	0	7.2	5.3	0	0.5	0.5	0	0.1	0.5	0.7	0.3	3.3	SD	SD	186357600	6561830	6548500	37451808	2862100	0	10635.4	432064	5865500	328726	297319	180771	SD	SD
	1983	746949	178614	569372	0.6	0.6	0.6	6.5	7	0.7	0.5	6.5	0.1	0.1	0	7.5	5.5	0.1	0.5	0.6	0	0.1	0.5	0.8	0.3	3.5	SD	SD	189505600	6990432	7922000	42793904	3501700	0	10818.2	450269	6635500	328726	297319	180462	SD	SD
	1984	764245	184406	580343	0.6	0.6	0.6	6.7	7.3	0.7	0.6	6.7	0.1	0.1	0	7.7	5.7	0.1	0.6	0.6	0	0.1	0.6	0.8	0.3	3.6	SD	SD	174076000	7830888	8441800	45476000	3115200	0	10987.3	459393	7999400	328726	297319	181452	SD	SD
	1985	781667	190339	591398	0.7	0.7	0.7	6.9	7.5	0.7	0.6	6.9	0.1	0.1	0	8	5.9	0.1	0.6	0.7	0	0.1	0.6	0.9	0.3	3.7	SD	SD	170319200	7612032	6643700	44068800	3128000	0	11119.6	465644	8665400	328726	297319	181340	SD	SD
	1986	799181	196420	602522	0.7	0.7	0.7	7.2	7.8	0.8	0.7	7.2	0.1	0.1	0	8.3	6.1	0.1	0.6	0.7	0	0.1	0.6	0.9	0.3	3.9	SD	SD	171680992	7101371	7592800	47051808	3076600	0	11296.3	475997	9617600	328726	297319	181192	SD	SD
	1987	816793	202640	613689	0.8	0.8	0.8	7.4	8	0.9	0.7	7.4	0.1	0.1	0	8.5	6.3	0.1	0.7	0.8	0	0.1	0.7	1	0.4	4	SD	SD	186089504	7178130	5721300	44322896	3244600	0	11356.1	466756	8342700	328726	297319	181543	SD	SD
	1988	834489	208987	624846	0.8	0.8	0.8	7.7	8.3	0.9	0.8	7.7	0.1	0.1	0.1	8.8	6.6	0.1	0.7	0.8	0	0.1	0.7	1.1	0.4	4.1	SD	SD	196736896	10179569	8228700	46169408	4036300	0	11481.6	488294	10765000	328726	297319	181091	SD	SD
	1989	852270	215436	635939	0.9	0.9	0.9	7.9	8.6	1	0.8	7.9	0.2	0.1	0.1	9.1	6.8	0.1	0.8	0.9	0.1	0.1	0.8	1.1	0.4	4.3	SD	SD	203036800	10994467	9651300	54110208	3902000	0	11608.1	494011	11314300	328726	297319	181501	SD	SD
	1990	870133	221979	646911	1	0.9	1	8.2	8.9	1	0.9	8.2	0.2	0.1	0.1	9.4	7.1	0.1	0.8	0.9	0.1	0.1	0.8	1.2	0.5	4.4	86564	9.94836	225569200	11157047	8961700	49849504	4084900	0	11735.7	502462	12018000	328726	297319	181413	51967	63939
	1991	888055	228487	657861	1	1	1	8.5	9.1	1.1	1	8.5	0.2	0.1	0.1	9.7	7.3	0.1	0.9	1	0.1	0.1	0.9	1.3	0.5	4.6	89981	10.1324	241045504	11552460	8064400	55134496	3529000	0	11870.2	509416	12728100	328726	297319	181586	51648.9	64084.1
	1992	906021	234834	668916	1.1	1.1	1.1	8.8	9.4	1.2	1.1	8.8	0.2	0.1	0.1	10	7.6	0.1	0.9	1	0.1	0.2	0.9	1.4	0.5	4.7	93657	10.3372	254000000	13478824	9992100	55689504	3870400	0	12050.4	515652	12154400	328726	297319	181305	51784.8	64229.2
	1993	924058	241245	679862	1.2	1.2	1.2	9.1	9.7	1.3	1.1	9.1	0.2	0.1	0.1	10.4	7.8	0.1	1	1.1	0.1	0.2	1	1.4	0.6	4.9	96994	10.4965	228030000	13641527	9601000	57210100	3274700	0	12103.3	521926	12385300	328726	297319	181382	51562.7	64374.3
	1994	942204	247738	690715	1.3	1.2	1.3	9.4	10.1	1.4	1.2	9.4	0.2	0.1	0.1	10.7	8.1	0.1	1.1	1.2	0.1	0.2	1.1	1.5	0.6	5	100801	10.6984	229670000	13775663	8884400	59840000	3057400	0	12173.5	529710	13563700	328726	297319	181291	51508.6	64519.4
	1995	960483	254314	701490	1.4	1.3	1.4	9.7	10.4	1.5	1.3	9.7	0.3	0.2	0.1	11	8.4	0.2	1.1	1.2	0.1	0.2	1.1	1.6	0.7	5.2	104522	10.8822	275540000	14842121	9534000	65767400	3440000	0	12237.7	533960	13876200	328726	297319	180945	51709.5	64664.5
	1996	978893	260973	712174	1.5	1.4	1.5	10	10.7	1.6	1.4	10	0.3	0.2	0.1	11.4	8.7	0.2	1.2	1.3	0.1	0.2	1.2	1.7	0.7	5.3	109381	11.1739	281100000	15862791	10769000	62097400	3507800	0	12305	541207	14338000	328726	297319	180589	51920.4	64809.6
	1997	997405	267702	722758	1.6	1.5	1.6	10.3	11.1	1.7	1.6	10.3	0.3	0.2	0.1	11.7	9	0.2	1.3	1.4	0.1	0.3	1.3	1.8	0.8	5.5	115023	11.5322	277560000	15803477	10816000	69350200	2955800	0	12329.6	546619	16188000	328726	297319	180981	51383.3	64954.7
	1998	1.01597e+06	274510	733236	1.7	1.7	1.7	10.7	11.4	1.8	1.7	10.7	0.4	0.2	0.1	12.1	9.3	0.2	1.3	1.5	0.2	0.3	1.3	1.9	0.8	5.6	120279	11.8388	279541504	15777719	11147700	66345000	2557600	0	12342	553369	16797500	328726	297319	180874	51345.2	65099.8
	1999	1.03454e+06	281397	743618	1.9	1.8	1.9	11	11.8	1.9	1.9	11	0.4	0.3	0.2	12.5	9.7	0.3	1.4	1.5	0.2	0.3	1.4	2	0.9	5.8	128004	12.373	310332800	14685648	11509600	71287504	2866000	0	12353.1	556844	18056700	328726	297319	181021	51053.1	65244.9
	2000	1.05305e+06	288365	753897	2	1.9	2	11.4	12.1	2	2	11.4	0.5	0.3	0.2	12.9	10	0.3	1.5	1.6	0.2	0.4	1.5	2.1	0.9	5.9	135814	12.8972	299323904	13420908	12043200	76368896	2847000	0	12349	551550	16702300	328726	297319	180975	50954	65390
	2001	1.07148e+06	295795	763706	2.2	2.1	2.2	11.8	12.5	2.2	2.2	11.8	0.5	0.3	0.2	13.3	10.4	0.3	1.6	1.7	0.2	0.4	1.6	2.2	1	6.1	143223	13.3669	295956000	13356131	13160200	69680896	3296200	0	12401.6	556347	17344300	328726	297319	180487	50978.2	65853.8
	2002	1.08981e+06	304105	772601	2.4	2.2	2.4	12.2	12.9	2.3	2.4	12.2	0.6	0.4	0.2	13.7	10.8	0.4	1.7	1.8	0.3	0.5	1.7	2.4	1.1	6.2	150955	13.8515	297207808	11488589	11151700	72766304	2618800	0	12434.7	541579	16122600	328726	297319	180560	50441.4	66317.6
	2003	1.10803e+06	312516	781270	2.5	2.4	2.5	12.6	13.3	2.5	2.6	12.6	0.7	0.4	0.3	14.2	11.2	0.4	1.8	1.9	0.3	0.5	1.8	2.5	1.1	6.4	159689	14.412	287383200	15826577	14984300	65760800	4230800	0	12489	552586	SD	328726	297319	180249	50288.6	66781.4
	2004	1.12614e+06	321000	789626	2.8	2.6	2.8	13	13.8	2.7	2.8	13	0.8	0.5	0.3	14.6	11.6	0.5	1.9	2	0.3	0.6	1.9	2.6	1.2	6.5	169145	15.0199	233861792	16522541	14172000	72156200	2883900	0	12714.3	561659	SD	328726	297319	180375	49698.8	67245.2
	2005	1.14412e+06	329517	797627	3	2.8	3	13.5	14.2	2.9	3.1	13.5	0.9	0.5	0.4	15.1	12	0.5	2	2.1	0.4	0.7	2	2.8	1.3	6.7	178615	15.6116	237088400	19377949	14709900	68636896	2630800	0	12954.7	579726	SD	328726	297319	180126	49484	67709
	2006	1.16198e+06	338064	805226	3.2	3	3.2	13.9	14.6	3.1	3.3	13.9	1	0.6	0.4	15.6	12.4	0.6	2.1	2.3	0.4	0.8	2.1	2.9	1.4	6.8	191300	16.4633	281171808	19742363	15097000	69354496	3270000	0	13179.2	593750	SD	328726	297319	179906	49287.8	68125.2
	2007	1.17968e+06	346643	812452	3.5	3.2	3.5	14.4	15.1	3.3	3.6	14.4	1.1	0.7	0.5	16	12.8	0.7	2.3	2.4	0.5	0.9	2.3	3.1	1.5	6.9	203854	17.2804	355519712	23443376	18955400	75806704	3930000	0	13512.5	609763	SD	328726	297319	179620	49157.6	68541.4
	2008	1.19715e+06	355287	819375	3.8	3.5	3.8	14.9	15.6	3.5	3.9	14.9	1.3	0.8	0.5	16.6	13.3	0.8	2.4	2.5	0.6	1	2.4	3.2	1.6	7.1	217205	18.1436	348187904	19969781	19731400	78570200	3010000	0	13517.1	616777	SD	328726	297319	179757	48604.4	68957.6
	2009	1.21427e+06	364025	826114	4.1	3.8	4.1	15.4	16	3.8	4.3	15.4	1.4	0.9	0.6	17.1	13.8	0.9	2.5	2.7	0.7	1.1	2.5	3.4	1.7	7.2	227336	18.722	285029312	20336998	16719500	80679400	2430000	0	13526.7	612434	SD	328726	297319	180068	47877.2	69373.8
	2010	1.23098e+06	372902	832723	4.4	4	4.4	15.9	16.5	4.1	4.6	15.9	1.6	1	0.7	17.6	14.3	1	2.7	2.8	0.8	1.2	2.7	3.6	1.8	7.3	239664	19.4694	292301600	24957213	21725800	80803600	4890000	0	13547.7	622349	SD	328726	297319	179573	47956	69790
	2011	1.24724e+06	381926	839231	4.7	4.4	4.7	16.4	17	4.4	5	16.4	1.8	1.1	0.8	18.2	14.8	1.1	2.9	3	0.9	1.4	2.9	3.8	2	7.4	254998	20.445	342382016	25284738	21760000	86874000	4330000	0	13558.9	632485	SD	328726	297319	179670	47680.6	69968.4
	2012	1.26307e+06	391171	845516	5.1	4.7	5.1	17	17.5	4.7	5.5	17	2	1.3	0.9	18.7	15.3	1.3	3	3.1	1	1.6	3	4	2.1	7.5	271375	21.4854	361036992	25054846	22260000	94880000	3760000	0	13559.3	626576	SD	328726	297319	179642	47530.2	70146.8
	2013	1.27856e+06	400606	851534	5.5	5	5.5	17.5	18	5	5.9	17.5	2.3	1.4	1	19.3	15.8	1.4	3.2	3.3	1.1	1.7	3.2	4.2	2.2	7.6	278666	21.7953	341200000	25707041	24259510	93510000	4020000	0	13541.4	628698	SD	328726	297319	179698	47295.8	70325.2
	2014	1.29386e+06	410204	857198	5.9	5.4	5.9	18.1	18.6	5.3	6.4	18.1	2.6	1.6	1.1	19.9	16.4	1.6	3.4	3.5	1.2	1.9	3.4	4.4	2.4	7.8	286849	22.17	352142000	23581740	24170000	95850000	4230000	0	17547.3	730458	SD	328726	297319	179721	47094.4	70503.6
	2015	1.30905e+06	419939	862451	6.3	5.8	6.3	18.7	19.1	5.7	6.9	18.7	2.9	1.8	1.3	20.5	16.9	1.8	3.6	3.7	1.4	2.2	3.6	4.7	2.5	SD	295514	22.5746	362333000	SD	22570000	86530000	4260000	0	13547.2	630218	SD	328726	297319	179721	46916	70682
JAPAN	1975	112423	83896.5	26908	8.4	7.5	8.4	14.9	14.9	7.4	9.3	14.9	1.7	1.1	0.8	15.4	14.3	1.1	1	1	0.6	1.6	1	1.4	0.6	SD	SD	SD	1973000	142529	14000	240700	155600	28200	210.152	26282.7	1801300	37780	36650	6273	SD	SD
	1976	113690	85051.4	26941	8.8	7.8	8.8	15.3	15.2	7.7	9.8	15.3	1.8	1.2	0.8	15.7	14.8	1.2	1.1	1.1	0.7	1.7	1.1	1.5	0.7	SD	SD	SD	1981000	127236	11000	222400	143800	21500	214.153	26681.7	2086000	37780	36650	6236	SD	SD
	1977	114839	85933.4	27134	9.2	8.1	9.2	15.7	15.4	8	10.3	15.7	2	1.3	0.9	16.1	15.2	1.3	1.1	1.1	0.7	1.9	1.1	1.5	0.7	SD	SD	SD	2328000	128981	8130	236400	171900	18100	223.188	27160.5	2124000	37780	36640	6215	SD	SD
	1978	115890	86749.5	27305	9.5	8.4	9.5	16	15.7	8.2	10.8	16	2.1	1.4	1	16.4	15.7	1.4	1.2	1.2	0.8	2	1.2	1.6	0.8	SD	SD	SD	2544000	193428	7000	366700	147300	19700	231.444	26618.7	2221000	37780	36640	6194	SD	SD
	1979	116878	87530.1	27463	9.8	8.7	9.8	16.4	16	8.4	11.2	16.4	2.3	1.5	1.1	16.6	16.1	1.5	1.2	1.2	0.8	2.2	1.2	1.6	0.8	SD	8044	6.88239	2311000	197742	5000	541300	128800	14000	240.52	27102.2	2344000	37780	36640	6174	SD	SD
	1980	117827	88296.6	27616	10.1	9	10.1	16.7	16.2	8.6	11.6	16.7	2.4	1.6	1.1	16.9	16.5	1.6	1.3	1.2	0.8	2.3	1.3	1.7	0.8	5.7	8504	7.21734	2095000	184842	3500	582800	89400	13600	245.36	25585.7	1816000	37780	36630	6061	SD	SD
	1981	118743	89103.1	27719	10.4	9.3	10.4	17	16.4	8.7	12.1	17	2.5	1.7	1.2	17.1	16.9	1.7	1.3	1.2	0.9	2.5	1.3	1.7	0.9	5.8	8418	7.08925	2237000	222848	3150	587400	88200	7600	252.648	25606.9	1879000	37780	36640	6042	SD	SD
	1982	119616	89909.9	27799	10.7	9.6	10.7	17.3	16.6	8.9	12.4	17.3	2.7	1.8	1.3	17.3	17.3	1.8	1.3	1.3	0.9	2.6	1.3	1.8	0.9	5.9	8687	7.26243	2256000	216884	2050	741800	152100	8800	257.405	26001.1	1984500	37780	36620	6026	SD	SD
	1983	120438	90684.5	27868	11	9.9	11	17.6	16.8	9	12.8	17.6	2.8	1.9	1.4	17.5	17.6	1.9	1.4	1.3	1	2.7	1.4	1.8	0.9	6	8892	7.38305	2526000	228435	1067	695300	93400	8759	262.878	26417.5	2098400	37780	36620	6011	SD	SD
	1984	121200	91402.2	27917	11.2	10.1	11.2	17.8	17	9.1	13.2	17.8	3	1.9	1.5	17.7	18	1.9	1.4	1.3	1	2.9	1.4	1.8	1	6.1	9470	7.81354	2553000	227262	1570	740500	168400	7750	267.526	26896.2	2097900	37780	36470	5996	SD	SD
	1985	121894	92046.3	27942	11.4	10.3	11.4	18.1	17.3	9.2	13.5	18.1	3.1	2	1.5	17.9	18.3	2	1.4	1.4	1	3	1.4	1.9	1	6.2	9244	7.58364	2638000	213297	1560	874200	140700	6760	268.464	26990.6	2024000	37780	36460	5879	SD	SD
	1986	122520	92625.7	27926	11.6	10.5	11.6	18.4	17.5	9.3	13.8	18.4	3.2	2.1	1.6	18.1	18.7	2.1	1.5	1.4	1	3.1	1.5	1.9	1	6.4	9144	7.46329	2240000	230861	1000	875700	127900	6420	270.978	27049.4	2052600	37780	36470	5858	SD	SD
	1987	123083	93140.4	27881	11.8	10.7	11.8	18.6	17.7	9.3	14	18.6	3.4	2.2	1.7	18.2	19	2.2	1.5	1.4	1.1	3.2	1.5	1.9	1.1	6.5	9134	7.421	2374000	263728	1000	863700	131700	6030	268.254	26110.1	2036600	37780	36460	5840	SD	SD
	1988	123595	93610.1	27823	11.9	10.8	11.9	18.9	17.9	9.4	14.3	18.9	3.5	2.2	1.7	18.4	19.4	2.2	1.6	1.5	1.1	3.3	1.6	2	1.1	6.7	9647	7.80533	2261000	244032	800	1021000	131600	4600	266.884	25738.3	1943000	37780	36460	5817	SD	SD
	1989	124069	94069.9	27761	12.1	10.9	12.1	19.1	18.1	9.5	14.5	19.1	3.6	2.2	1.7	18.6	19.7	2.3	1.6	1.5	1.1	3.4	1.6	2	1.2	6.8	9211	7.4241	2684000	239005	800	984500	142200	4610	268.031	25744.6	1938000	37780	36460	5729	SD	SD
	1990	124516	94545.8	27703	12.2	11	12.2	19.4	18.4	9.6	14.7	19.4	3.8	2.4	1.8	18.7	20.1	2.4	1.6	1.5	1.2	3.5	1.6	2	1.2	7	9470	7.60548	1983000	197992	807	951500	150300	4690	271.574	26369.2	1838000	37780	36460	5693	5817	24950
	1991	124940	95060.9	27642	12.4	11.2	12.4	19.6	18.6	9.7	15	19.6	3.9	2.4	1.8	18.9	20.4	2.4	1.7	1.6	1.2	3.6	1.7	2.1	1.3	7.1	9634	7.7109	1894000	180239	769	759000	132800	3250	276.59	26054.6	1752000	37780	36460	5654	5863.4	24942.6
	1992	125341	95599.8	27581	12.6	11.3	12.6	19.9	18.8	9.8	15.2	19.9	4	2.5	1.9	19	20.8	2.5	1.7	1.6	1.2	3.7	1.7	2.1	1.3	7.3	9823	7.83699	1779000	172092	700	758700	102400	2240	281.161	26486	1784000	37780	36460	5615	5909.8	24935.2
	1993	125718	96139.3	27520	12.8	11.5	12.8	20.1	19.1	10	15.5	20.1	4.1	2.6	1.9	19.2	21.1	2.6	1.8	1.7	1.3	3.8	1.8	2.1	1.4	7.4	10239	8.14445	1640000	98178	500	637800	71700	1990	282.906	26686.8	1817100	37780	36460	5574	5958.2	24927.8
	1994	126063	96651.7	27450	13	11.7	13	20.4	19.3	10.1	15.7	20.4	4.2	2.6	2	19.4	21.5	2.6	1.8	1.7	1.3	3.9	1.8	2.2	1.4	7.6	10872	8.62425	1602000	105714	420	564800	108700	2570	280.337	26981.3	1763500	37780	36460	5533	6006.6	24920.4
	1995	126375	97117	27366	13.1	11.8	13.1	20.7	19.5	10.2	15.9	20.7	4.2	2.7	2.1	19.5	21.9	2.7	1.9	1.8	1.4	4	1.9	2.2	1.5	7.7	14225	11.2561	1622000	120830	300	443600	138100	3000	275.441	25907.1	1641100	37780	36460	5443	6104	24913
	1996	126654	97521.3	27274	13.2	11.9	13.2	21	19.8	10.3	16	21	4.3	2.7	2.1	19.7	22.3	2.7	1.9	1.8	1.4	4	1.9	2.3	1.5	7.9	12838	10.1363	1616000	146228	250	478100	110800	2000	270.537	24937.3	1563000	37780	36450	5399	6145.4	24905.6
	1997	126903	97877.8	27171	13.3	12	13.3	21.3	20	10.4	16.1	21.3	4.4	2.8	2.1	19.9	22.7	2.8	2	1.9	1.4	4.1	2	2.3	1.6	8	12370	9.74763	1437000	126386	270	573100	104700	2000	266.442	24568.3	1509700	37780	36450	5354	6197.8	24898.2
	1998	127127	98206.5	27060	13.4	12.1	13.4	21.6	20.3	10.5	16.2	21.6	4.4	2.8	2.1	20.1	23.1	2.8	2.1	1.9	1.4	4.1	2.1	2.4	1.7	8.2	12537	9.86177	1664000	134844	230	569500	102400	2000	264.17	23604.5	1418600	37780	36450	5310	6249.2	24890.8
	1999	127336	98532.3	26949	13.5	12.1	13.5	21.9	20.5	10.6	16.2	21.9	4.4	2.8	2.2	20.3	23.5	2.8	2.1	2	1.5	4.1	2.1	2.5	1.8	8.4	12814	10.0632	1571000	158394	180	583100	102000	2000	261.315	23459.1	1438700	37780	36450	5271	6295.6	24883.4
	2000	127534	98872.9	26842	13.5	12.2	13.5	22.2	20.7	10.7	16.3	22.2	4.5	2.9	2.2	20.5	23.9	2.9	2.2	2.1	1.5	4.2	2.2	2.5	1.8	8.5	12303	9.64684	1395000	196191	180	688200	103500	1500	257.321	23315.6	1452300	37780	36450	5258	6316	24876
	2001	127724	100766	25207	13.6	12.2	13.6	22.5	21	10.8	16.4	22.5	4.5	2.9	2.2	20.8	24.4	2.9	2.3	2.2	1.5	4.2	2.3	2.6	1.9	8.7	12147	9.51039	1499000	238909	170	699900	94600	2000	253.875	22855.6	1354000	37788	36450	4793	6769.2	24887.8
	2002	127903	103079	23170	13.7	12.3	13.7	22.9	21.4	10.9	16.5	22.9	4.6	2.9	2.2	21	24.9	2.9	2.4	2.2	1.5	4.3	2.4	2.7	2.1	8.8	12635	9.87861	1328000	223244	160	827800	99900	2600	255.203	23084	1284000	37789	36450	4763	6787.4	24899.6
	2003	128068	105262	21261	13.9	12.4	13.9	23.4	21.8	11	16.6	23.4	4.6	3	2.3	21.3	25.5	3	2.5	2.4	1.6	4.3	2.5	2.8	2.2	9	12879	10.0564	1389000	192440	155	855900	81800	2500	253.274	22927.1	SD	37790	36450	4736	6802.6	24911.4
	2004	128214	107301	19472	14	12.6	14	23.8	22.2	11.2	16.7	23.8	4.7	3.1	2.3	21.7	26.1	3.1	2.6	2.5	1.6	4.4	2.6	2.9	2.3	9.1	12637	9.85621	1187000	137629	150	860300	117800	2000	250.449	23145.3	SD	37791	36450	4714	6812.8	24923.2
	2005	128336	109174	17805	14.2	12.7	14.2	24.4	22.6	11.3	16.9	24.4	4.8	3.1	2.4	22	26.8	3.1	2.7	2.6	1.7	4.5	2.7	3	2.5	9.3	13621	10.6136	1214000	186488	151	874700	104600	2000	245.964	22920.8	SD	37791	36450	4692	6823	24935
	2006	128433	110681	16455	14.3	12.8	14.3	24.9	23.1	11.5	17	24.9	4.9	3.2	2.4	22.4	27.5	3.2	2.9	2.7	1.7	4.6	2.9	3.1	2.7	9.4	13650	10.6281	1310000	189268	153	837200	83000	2000	245.067	22684.6	SD	37792	36450	4671	6837.8	24941.2
	2007	128505	111995	15253	14.4	12.9	14.4	25.4	23.5	11.6	17.1	25.4	4.9	3.2	2.5	22.8	28.2	3.2	3	2.9	1.7	4.7	3	3.2	2.8	9.6	13999	10.8937	1500000	186842	155	910100	87500	400	244.778	22597.4	SD	37793	36450	4650	6852.6	24947.4
	2008	128551	113198	14122	14.5	13	14.5	25.9	24	11.7	17.2	25.9	5	3.3	2.5	23.1	28.9	3.3	3.2	3	1.7	4.8	3.2	3.3	3	9.7	14462	11.2501	1598000	214720	160	881200	93800	300	245.553	22109.2	SD	37794	36450	4628	6868.4	24953.6
	2009	128567	114290	13063	14.6	13.1	14.6	26.4	24.4	11.8	17.2	26.4	5	3.3	2.5	23.4	29.6	3.3	3.3	3.2	1.7	4.8	3.3	3.5	3.2	9.8	13987	10.8792	1515000	189941	165	674200	68700	250	245.375	21840	SD	37794.7	36450	4609	6881.2	24959.8
	2010	128552	115282	12070	14.6	13.1	14.6	26.9	24.9	11.8	17.2	26.9	5	3.3	2.5	23.8	30.3	3.3	3.5	3.3	1.8	4.9	3.5	3.6	3.4	9.9	14422	11.2188	1469000	182879	166	571300	76900	289	242.458	21846.4	SD	37795	36455	4593	6896	24966
	2011	128505	116176	11143	14.6	13.1	14.6	27.4	25.3	11.9	17.1	27.4	5.1	3.4	2.6	24	30.9	3.4	3.6	3.5	1.7	4.9	3.6	3.7	3.6	9.9	14664	11.4112	1000000	181742	167	746300	69900	275	234.919	20856.6	SD	37795.5	36455.5	4561	6930.1	24964.4
	2012	128426	116946	10304	14.5	13	14.5	27.8	25.7	11.9	17.1	27.8	5.1	3.4	2.6	24.3	31.6	3.4	3.8	3.6	1.7	4.9	3.8	3.8	3.8	10	14486	11.2796	1108000	194063	170	857800	86200	261	230.942	20325.7	SD	37796	36456	4549	6944.2	24962.8
	2013	128313	117596	9547	14.5	13	14.5	28.2	26.1	11.9	16.9	28.2	5.1	3.3	2.6	24.5	32.2	3.3	3.9	3.8	1.7	4.9	3.9	3.9	4	10	13812	10.7643	1191000	165145	180	811700	83300	285	225.446	20719.6	SD	37796.2	36456	4538	6956.8	24961.2
	2014	128163	118136	8864	14.4	12.9	14.4	28.6	26.4	11.8	16.8	28.6	5.1	3.3	2.5	24.7	32.8	3.3	4.1	3.9	1.7	4.9	4.1	4	4.2	10.1	13669	10.6653	1159000	190313	189	852400	97300	348	219.76	20616.6	SD	37796.2	36456	4518	6978.4	24959.6
	2015	127975	118572	8246	14.3	12.8	14.3	29	26.8	11.8	16.7	29	5.1	3.3	2.5	24.9	33.4	3.3	4.2	4.1	1.7	4.9	4.2	4.1	4.4	SD	13327	10.4138	1260000	SD	169	1004000	89200	302	230.942	27716.7	SD	37797.1	36456	4496	7002	24958
AUSTRALIA	1975	13831.2	11936.7	1956	19.9	19.5	19.9	41.7	41.8	20.3	19.6	41.7	4.6	3.8	3.4	37.3	46.1	3.8	10.5	10.5	4	3.6	10.5	11.3	9.6	SD	SD	SD	21959008	177410	133300	11982000	6064	1141000	3262.78	121891	721667	774122	768230	486837	SD	SD
	1976	13994.6	12087.2	1968	20.2	19.8	20.2	42.2	42.4	20.6	19.9	42.2	4.8	3.9	3.5	37.7	46.8	3.9	10.7	10.8	4.1	3.7	10.7	11.5	9.9	SD	SD	SD	23343552	126935	131466	11800000	5937	1071845	3276.14	122492	980584	774122	768230	487773	SD	SD
	1977	14152.1	12213.5	1998	20.6	20.1	20.6	42.8	42.9	20.9	20.2	42.8	5	4.1	3.6	38.2	47.5	4.1	11	11	4.3	3.9	11	11.8	10.2	SD	SD	SD	23493152	158711	144177	9370336	8223	990467	3051.37	114364	1014380	774122	768230	478611	SD	SD
	1978	14309.3	12339.8	2029	20.9	20.4	20.9	43.3	43.5	21.3	20.5	43.3	5.1	4.2	3.7	38.7	48.1	4.2	11.3	11.3	4.4	4	11.3	12.1	10.4	SD	SD	SD	21457008	245476	130107	18090000	4970	1763297	2884.64	109197	1083550	774122	768230	476530	SD	SD
	1979	14473.2	12471.8	2061	21.2	20.7	21.2	43.9	44.1	21.6	20.8	43.9	5.3	4.3	3.9	39.1	48.7	4.3	11.5	11.6	4.5	4.2	11.5	12.3	10.7	SD	1491	10.3018	21151072	282341	168800	16188000	1535	1411075	2770.5	105673	1213810	774122	768230	480477	SD	SD
	1980	14649.1	12613.9	2094	21.5	21	21.5	44.4	44.6	21.9	21.1	44.4	0.5	4.5	4	39.6	49.4	4.5	11.8	11.9	4.6	4.3	11.8	12.6	11	5.1	1634	11.1543	23975648	235610	150903	10856000	2152	1128315	2729.15	103994	1162440	774122	768230	482926	SD	SD
	1981	14838.5	12767.6	2130	21.8	21.3	21.8	45	45.2	22.2	21.5	45	5.7	4.6	4.1	40.1	50.1	4.6	12.1	12.2	4.8	4.5	12.1	12.9	11.3	5.2	1717	11.5713	25093808	246867	172800	16360000	5745	1617163	2652.74	101805	1144230	774122	768230	482741	SD	SD
	1982	15041.1	12932.7	2168	22.2	21.7	22.2	45.6	45.7	22.5	21.8	45.6	5.8	4.8	4.3	40.6	50.8	4.8	12.4	12.5	4.9	4.7	12.4	13.2	11.7	5.2	1617	10.7506	24817104	257678	212397	8875571	4940	848000	2643.53	101156	1147100	774122	768230	478081	SD	SD
	1983	15257.4	13109.4	2209	22.5	22	22.5	46.2	46.3	22.9	22.2	46.2	6.1	5	4.4	41.1	51.5	5	12.8	12.8	5	4.9	12.8	13.5	12	5.2	1693	11.0963	24191168	210947	139126	22016000	15095	2295787	2481.14	96747.2	1187700	774122	768230	471125	SD	SD
	1984	15487.2	13297.2	2251	22.9	22.4	22.9	46.8	46.9	23.2	22.5	46.8	6.3	5.1	4.6	41.6	52.2	5.1	13.1	13.1	5.2	5.1	13.1	13.8	12.4	5.3	1890	12.2036	25450304	308595	238150	18666032	18912	1367428	2509.83	98259.1	1249200	774122	768230	473039	SD	SD
	1985	15729.6	13495.1	2296	23.2	22.7	23.2	47.5	47.4	23.6	22.9	47.5	6.5	5.3	4.8	42.2	52.9	5.3	13.4	13.5	5.3	5.3	13.4	14.1	12.7	5.3	1914	12.1681	24401600	527480	291430	15999000	18918	1329678	2628.31	102440	1155000	774122	768230	472960	SD	SD
	1986	15986.2	13704.5	2343	23.6	23	23.6	48.1	48	23.9	23.2	48.1	6.7	5.5	5	42.7	53.6	5.5	13.8	13.8	5.5	5.5	13.8	14.5	13.1	5.4	1952	12.2106	24742000	459099	277700	16119000	23889	1619000	2648.05	102778	1194500	774122	768230	470885	SD	SD
	1987	16254.9	13934	2382	23.9	23.3	23.9	48.7	48.6	24.2	23.6	48.7	7	5.7	5.1	43.3	54.3	5.7	14.2	14.2	5.7	5.7	14.2	14.8	13.5	5.4	2041	12.5562	24831680	382650	206419	12287000	21382	1733000	2573.81	100134	1382300	774122	768230	471020	SD	SD
	1988	16527.4	14166.2	2422	24.3	23.7	24.3	49.4	49.1	24.6	24	49.4	7.2	5.9	5.3	43.8	55	5.9	14.6	14.5	5.9	6	14.6	15.2	13.9	5.5	2013	12.1798	27145968	449005	208230	13935000	20708	1838143	2597.72	101545	1395900	774122	768230	472283	SD	SD
	1989	16792.3	14390.8	2460	24.7	24	24.7	50	49.7	25	24.4	50	7.5	6.1	5.5	44.4	55.8	6.1	15	14.9	6.1	6.2	15	15.6	14.4	5.5	2150	12.8035	26940336	471998	216684	14214495	14365	1640404	2705.06	105781	1393400	774122	768230	467077	SD	SD
	1990	17041.4	14600.7	2496	25.1	24.4	25.1	50.7	50.3	25.3	24.9	50.7	7.8	6.4	5.7	45	56.5	6.4	15.4	15.3	6.3	6.5	15.4	16	14.8	5.6	2171	12.7395	24369936	423274	218730	15066100	16714	1529841	2819.41	161192	1163700	774122	768230	464481	175208	128541
	1991	17271.9	14792.7	2529	25.5	24.8	25.5	51.4	50.9	25.8	25.3	51.4	8.1	6.7	6	45.6	57.3	6.7	15.9	15.7	6.5	6.8	15.9	16.4	15.3	5.7	2273	13.1601	21366000	605233	193701	10557400	22336	1689829	2792.97	159594	1284600	774122	768230	462974	176685	128571
	1992	17485.9	14998.5	2530	26	25.3	26	52.1	51.5	26.2	25.9	52.1	8.4	6.9	6.2	46.3	58	6.9	16.4	16.2	6.8	7.1	16.4	16.9	15.8	5.8	2404	13.7482	20641000	608029	268947	14738678	19000	1936590	2688.16	156468	1417900	774122	768230	466178	173451	128601
	1993	17687.5	15198.5	2526	26.5	25.8	26.5	52.8	52.1	26.7	26.4	52.8	8.7	7.2	6.5	47	58.8	7.2	16.9	16.6	7	7.4	16.9	17.4	16.3	5.9	2566	14.5074	27959000	562091	198766	16479000	31900	1647000	2617.98	154263	1511500	774122	768230	460286	179313	128631
	1994	17882.7	15398.8	2522	27.1	26.3	27.1	53.6	52.7	27.1	27	53.6	9	7.5	6.8	47.7	59.6	7.5	17.4	17.1	7.3	7.8	17.4	17.9	16.9	6	2755	15.4059	31312000	532697	204095	8961000	20500	924000	2677.78	155468	1725500	774122	768230	469100	170469	128661
	1995	18076.7	15606.1	2518	27.6	26.8	27.6	54.3	53.3	27.6	27.6	54.3	9.4	7.8	7.1	48.4	60.4	7.8	18	17.6	7.5	8.1	18	18.4	17.5	6.1	2671	14.7759	34943000	686912	242370	16504000	23200	1875000	2582.02	153097	1867400	774122	768230	463348	176191	128691
	1996	18271.7	15823.4	2516	28.1	27.3	28.1	55.1	53.9	28	28.1	55.1	9.7	8.2	7.4	49.2	61.3	8.2	18.5	18.1	7.8	8.5	18.5	19	18.1	6.2	2970	16.2547	37436000	782264	325000	23702000	49800	1653000	2625.1	144887	2015900	774122	768230	465221	174288	128721
	1997	18467.6	16058.1	2505	28.5	27.8	28.5	55.9	54.5	28.4	28.7	55.9	10.1	8.5	7.6	49.9	62.1	8.5	19.2	18.6	8.1	8.8	19.2	19.6	18.7	6.3	2846	15.4108	39938000	1101453	398000	19224000	37000	1634000	2645.1	143412	2184130	774122	768230	462200	177279	128751
	1998	18665	16300	2495	29	28.2	29	56.7	55.1	28.8	29.2	56.7	10.4	8.8	7.9	50.7	62.9	8.8	19.8	19.1	8.3	9.2	19.8	20.2	19.4	6.4	2873	15.3924	41064000	1613768	271000	22108000	53000	1798000	2629.61	150129	2249950	774122	768230	463786	175663	128781
	1999	18864.1	16543.9	2484	29.5	28.7	29.5	57.5	55.7	29.2	29.7	57.5	10.8	9.1	8.2	51.5	63.7	9.1	20.4	19.7	8.6	9.5	20.4	20.8	20	6.6	2957	15.6753	39699000	2208177	338000	24757000	47000	1118000	2598.77	180041	2353030	774122	768230	453729	185690	128811
	2000	19065.8	16787.4	2472	29.9	29.1	29.9	58.2	56.3	29.6	30.2	58.2	11.1	9.4	8.5	52.2	64.5	9.4	21	20.2	8.8	9.8	21	21.4	20.7	6.7	3009	15.7822	38164688	1786058	406043	22108000	58000	1050000	2686.1	195885	2275000	774122	768230	455500	183889	128841
	2001	19268.5	17027.7	2460	30.4	29.5	30.4	59	56.9	30	30.7	59	11.4	9.6	8.7	52.9	65.2	9.6	21.7	20.7	9.1	10.2	21.7	22	21.3	6.8	3093	16.0521	28116957	1747446	344934	22108078	50000	1049826	2634.54	195491	2383300	774122	768230	455700	183929	128601
	2002	19475.2	17258.3	2456	30.8	29.9	30.8	59.6	57.5	30.3	31.2	59.6	11.7	9.9	9	53.6	65.9	9.9	22.3	21.3	9.3	10.5	22.3	22.6	22	6.9	3296	16.9241	31424352	1691310	453853	24299335	38900	1433651	2607.36	187595	2279590	774122	768230	447000	192869	128361
	2003	19697	17498	2455	31.1	30.3	31.1	60.3	58.1	30.6	31.6	60.3	12	10.2	9.2	54.2	66.6	10.2	22.9	21.8	9.5	10.8	22.9	23.1	22.6	6.9	3425	17.3885	36994995	835582	310049	10131924	52000	957104	2475.98	122952	SD	774122	768230	439500	200609	128121
	2004	19948.4	17761.7	2457	31.5	30.6	31.5	60.9	58.6	30.9	32.1	60.9	12.3	10.4	9.5	54.9	67.2	10.4	23.5	22.4	9.7	11	23.5	23.7	23.2	7	3566	17.8761	36993454	1373707	394990	26131870	58000	2018103	2541.33	157634	SD	774122	768230	440110	200239	127881
	2005	20238.9	18058.2	2463	31.8	30.9	31.8	61.5	59.2	31.1	32.4	61.5	12.6	10.6	9.7	55.4	67.7	10.6	24	22.9	9.9	11.3	24	24.2	23.8	7	SD	SD	37822192	1479579	419672	21905113	53000	1282537	2558.98	124514	SD	774122	768230	445149	195440	127641
	2006	20573.6	18393	2473	32	31.2	32	62	59.7	31.3	32.8	62	12.8	10.8	9.8	56	68.2	10.8	24.6	23.5	10	11.5	24.6	24.8	24.4	7	3669	17.8335	37128107	1383301	361991	25150343	36000	1688047	2513.48	154659	SD	774122	768230	434925	206550	126755
	2007	20946.7	18760	2486	32.3	31.4	32.3	62.5	60.2	31.4	33.1	62.5	13	11	10	56.5	68.7	11	25.1	24	10.2	11.7	25.1	25.3	25	7.1	3818	18.2272	36396997	581959	239879	10821628	28565	748303	2442.96	140999	SD	774122	768230	425449	216912	125869
	2008	21342.5	19144	2501	32.5	31.6	32.5	62.9	60.7	31.6	33.4	62.9	13.2	11.1	10.2	57	69.1	11.1	25.7	24.6	10.3	11.9	25.7	25.8	25.5	7.1	4181	19.59	32621113	905124	387000	13569378	45500	1502305	2325.79	116192	SD	774122	768230	417288	225959	124983
	2009	21739	19522.6	2515	32.7	31.8	32.7	63.4	61.2	31.7	33.6	63.4	13.4	11.3	10.3	57.5	69.5	11.3	26.2	25.1	10.4	12.1	26.2	26.3	26.1	7.1	4176	19.2097	31456858	1449502	375670	21420177	50557	1160028	2331.7	124551	SD	774122	768230	409029	235104	124097
	2010	22120.1	19880.2	2524	32.9	32	32.9	63.9	61.7	31.8	33.9	63.9	13.5	11.4	10.4	58	70	11.4	26.7	25.6	10.5	12.3	26.7	26.8	26.7	7.1	3946	17.839	31234824	1509756	328000	21834010	43500	1161606	2220.85	103842	SD	774122	768230	398580	246439	123211
	2011	22479.8	20210.6	2530	33.1	32.1	33.1	64.4	62.2	31.9	34.2	64.4	13.7	11.6	10.6	58.5	70.5	11.6	27.3	26.2	10.6	12.5	27.3	27.3	27.3	7.1	4211	18.7324	25181814	2121965	356943	27410076	65247	1127683	2368.44	189757	SD	774122	768230	409673	235038	123519
	2012	22821.8	20518.5	2532	33.3	32.3	33.3	65	62.7	32.1	34.4	65	13.9	11.7	10.7	59	71.1	11.7	27.9	26.7	10.7	12.7	27.9	27.8	28	7.2	4241	18.5831	25957093	3045836	450535	29905009	44541	1262032	2379.64	190401	SD	774122	768230	405474	238929	123827
	2013	23150.7	20810.6	2532	33.5	32.5	33.5	65.5	63.1	32.2	34.7	65.5	14	11.9	10.8	59.6	71.6	11.9	28.5	27.3	10.9	12.9	28.5	28.4	28.6	7.2	4333	18.7165	27136082	3327248	506725	22855576	35000	1121135	2438.2	124534	SD	774122	768230	396615	247480	124135
	2014	23474.7	21099.1	2531	33.7	32.7	33.7	66.1	63.6	32.3	35	66.1	14.2	12.1	11	60.2	72.2	12.1	29.1	27.9	11	13.1	29.1	29	29.3	7.3	4353	18.5434	30517650	3031029	390364	25303037	32000	1254659	2402.67	152789	SD	774122	768230	406269	237518	124443
	2015	23799.6	21392.6	2530	33.9	32.9	33.9	66.6	64	32.4	35.3	66.6	14.3	12.1	11.1	60.7	72.7	12.2	29.8	28.4	11.1	13.3	29.8	29.5	30	SD	4662	19.5886	32379153	SD	494589	23742560	32000	1198006	3745.57	141820	SD	774122	768230	365913	277566	124751
RUSSIA	1975	253500	151668	102007			7.3			7.1	7.6	43.8				51.1	34.3	1.1			1	1.2	14.2	21.3	5.1	SD	SD	SD	0	SD	7328000	62250000	65000	11245000	9509.51	383300	17243000	2241237	2192334	550240	SD	SD
	1976	255686	154628	101282			7.6			7.4	7.8	44.2				51.5	34.9	1.2			1.1	1.3	14.5	21.6	5.3	SD	SD	SD	0	SD	10138000	91086000	81000	16300000	9559.66	386295	17732000	2241237	2192334	552300	SD	SD
	1977	257870	157583	100535			7.9			7.6	8.2	44.7				52	35.4	1.3			1.1	1.4	14.7	21.9	5.6	SD	SD	SD	0	SD	11000000	86668000	109000	16570000	9507.48	386340	18026000	2241237	2192334	553700	SD	SD
	1978	260072	160554	99775			8.2			7.9	8.5	45.1				52.4	36	1.3			1.2	1.5	15	22.2	5.8	SD	SD	SD	0	SD	9000000	113552000	91000	16720000	9685.15	395984	18412000	2241237	2192334	553100	SD	SD
	1979	262312	163304	99271			8.5			8.2	8.9	45.6				52.8	36.6	1.4			1.3	1.6	15.3	22.6	6	SD	SD	SD	0	SD	8374000	84886000	72000	13535000	9796.08	395732	17358000	2241237	2192334	552600	SD	SD
	1980	264605	165800	99083			8.9			8.5	9.2	46.1				53.2	37.2	1.5			1.4	1.7	15.5	22.9	6.3	7	3831	2.77482	0	SD	9454000	92500000	57000	13907000	9875.42	404437	18756000	2241237	2192334	553317	SD	SD
	1981	266937	168324	98915			9.2			8.8	9.6	46.6				53.6	37.9	1.6			1.4	1.8	15.8	23.2	6.6	7	3755	2.70131	0	SD	9418000	76650000	50000	10994000	9858.73	402887	19167000	2241237	2192334	553500	SD	SD
	1982	269295	170869	98757			9.6			9.1	10.1	47.1				54	38.5	1.8			1.5	2	16.1	23.6	6.9	7	4060	2.90064	0	SD	14720000	79757008	65000	15073000	9925.99	410816	20143000	2241237	2192334	556050	SD	SD
	1983	271689	173443	98611			10			9.4	10.5	47.6				54.4	39.2	1.9			1.6	2.1	16.4	23.9	7.1	7.1	4395	3.1181	0	SD	13293000	73748000	133000	16910000	10009.7	422194	22965000	2241237	2192334	556900	SD	SD
	1984	274134	176058	98479			10.3			9.7	10.9	48.1				54.8	39.9	2			1.7	2.2	16.7	24.2	7.4	7.2	4918	3.46447	0	SD	13573000	64960000	138000	17147008	10181	426871	23086000	2241237	2192334	556986	SD	SD
	1985	276625	178650	98419			10.7			10	11.3	48.7				55.2	40.6	2.1			1.8	2.4	17	24.5	7.7	7.2	5262	3.68034	0	SD	14406000	73200000	147000	18300000	10234.1	433473	25386900	2241237	2192334	557911	SD	SD
	1986	279177	181285	98381			11			10.3	11.7	49.2				55.6	41.3	2.2			1.9	2.5	17.3	24.8	8.1	7.3	4982	3.45934	0	SD	12479000	86573008	66000	18920000	10185.8	436351	26506000	2241237	2192334	558425	SD	SD
	1987	281745	183931	98350			11.3			10.5	12	49.7				55.8	42	2.3			1.9	2.7	17.6	25.1	8.4	7.4	5543	3.82128	0	SD	14808000	77331008	63000	15876000	10252.9	440641	27403000	2241237	2192334	556162	SD	SD
	1988	284193	186497	98274			11.6			10.7	12.4	50.2				56.3	42.7	2.4			2	2.8	17.9	25.4	8.7	7.5	6658	4.55902	0	SD	16030000	78826000	75000	13242000	10003	430454	27187000	2241237	2192334	556740	SD	SD
	1989	286343	188280	98664			11.8			11	12.7	50.6				56.6	43.3	2.5			2.1	2.9	18.2	25.7	9	7.5	8161	5.55567	0	SD	15305000	87162000	95000	14972000	10072.4	422957	24474000	2241237	2192334	556930	SD	SD
	1990	288070	189107	99559			12.1			11.2	13	51.1				56.9	44	2.6			2.2	3.1	18.5	26	9.4	7.6	9294	6.29809	0	SD	9883000	101888496	52000	15551000	9978.73	440684	21634000	2241237	2192334	556220	786690	849424
	1991	289328	189595	100292			12.4			11.4	13.4	51.4				57.1	44.6	2.7			2.2	3.2	18.7	26.2	9.7	7.7	10411	7.03254	0	SD	9788000	71991008	60000	12857800	9777.74	423901	19464000	2241237	2192334	555420	787350	849564
	1992	148318	109195	39603			12.7			11.6	13.7	51.8				57.3	45.1	2.8			2.3	3.3	19	26.4	10	7.7	11228	7.57022	0	2040757	2135210	46166670	6560	11241290	4533.62	190656	5510000	1709824	1638995	221631	608350	809014
	1993	148431	109222	39621			12.9			11.8	14	52.1				57.4	45.7	2.9			2.3	3.5	19.2	26.5	10.3	7.8	13046	8.78925	0	1820037	2441080	43546550	6310	11556349	4340.66	179691	3851000	1709824	1638618	218795	610778	809045
	1994	148412	109157	39607			13.1			11.9	14.3	52.4				57.5	46.2	3			2.4	3.6	19.4	26.7	10.6	7.8	14655	9.87455	0	1654978	891950	32128210	5030	10757255	4062.16	160661	1510000	1709824	1638133	217711	611345	809077
	1995	148289	109032	39570			13.3			12.1	14.5	52.7				57.6	46.7	3.1			2.4	3.7	19.6	26.8	10.9	7.8	14926	10.0655	0	2327401	1738440	30118470	4000	8562170	3603.77	144299	1750000	1709824	1637838	216400	612329	809109
	1996	148074	108859	39516			13.4			12.2	14.7	52.9				57.7	47.2	3.1			2.4	3.8	19.8	26.9	11.2	7.8	14190	9.58305	0	1646548	1081038	34831232	5548	8325683	3275.92	137314	1580000	1709824	1637796	216111	612544	809141
	1997	147768	108636	39444			13.6			12.2	14.9	53.2				57.8	47.7	3.2			2.4	3.9	20	27	11.5	7.8	13453	9.10411	0	1662118	2652012	44235132	5178	9382778	2900.27	120687	1550000	1709824	1637865	217989	610703	809173
	1998	147381	108362	39353			13.7			12.3	15	53.5				57.8	48.2	3.2			2.4	3.9	20.2	27.1	11.8	7.8	13451	9.12669	0	1766232	799940	26994700	4731	4656117	2602.74	116075	1264000	1709824	1638130	217287	611638	809205
	1999	146920	108033	39243			13.8			12.4	15.2	53.7				57.8	48.7	3.2			2.4	4	20.3	27.2	12.1	7.9	12469	8.48695	0	2333830	1033569	30996953	5538	4392715	2369.3	102721	1361000	1709824	1638851	216790	612824	809237
	2000	146397	107650	39112			13.9			12.5	15.3	54				57.9	49.2	3.2			2.4	4.1	20.5	27.3	12.4	7.9	11485	7.84513	0	2251040	1489399	34460052	5730	6002269	2322.23	103659	1420000	1709824	1638134	217162	611704	809268
	2001	145815	107209	38961			14.1			12.6	15.5	54.2				57.9	49.8	3.3			2.4	4.1	20.7	27.4	12.7	8	11188	7.67274	0	1641057	808360	46996294	6310	7718715	2267.65	101875	1602700	1709824	1638044	216861	612010	809173
	2002	145195	106727	38794			14.3			12.8	15.7	54.5				57.9	50.3	3.4			2.4	4.2	20.9	27.5	13.1	8	11098	7.64352	0	2174204	1499425	50622106	5570	5682843	2247.16	98082.4	1474000	1709824	1638094	216651	612366	809077
	2003	144585	106302	38577			14.5			12.9	15.9	54.7				58	50.8	3.5			2.5	4.4	21.1	27.6	13.4	8.1	11164	7.72143	0	2792722	2030896	34069788	9705	5169044	2196.44	101680	SD	1709824	1638098	216277	612840	808981
	2004	144045	105965	38366			14.7			13.1	16.2	55				58	51.3	3.6			2.5	4.5	21.4	27.7	13.7	8.1	10726	7.4463	0	2920781	3372956	45433661	10990	4936709	2066.54	92439.5	SD	1709824	1638123	215980	613257	808886
	2005	143618	105737	38196			15			13.4	16.6	55.3				58.1	51.9	3.7			2.6	4.8	21.6	27.8	14.1	8.2	10434	7.2651	0	3829322	3060164	47614681	10770	4545081	1923.57	88475	SD	1709824	1638139	215680	613669	808790
	2006	143323	105642	38073			15.4			13.7	17	55.7				58.3	52.6	3.9			2.7	5	21.9	28	14.5	8.3	10307	7.19145	0	4210622	3510351	44926880	10905	4860293	1823.11	85896.6	SD	1709824	1637774	215488	612227	810059
	2007	143150	105660	37992			15.8			14	17.6	56.1				58.4	53.3	4.1			2.8	5.3	22.2	28.2	14.9	8.4	9745	6.80754	0	3614789	3798020	49367973	9538	5383539	1828.29	86726.3	SD	1709824	1637774	215463	610983	811328
	2008	143083	105743	37934			16.3			14.4	18.2	56.6				58.7	54	4.4			3	5.7	22.5	28.4	15.3	8.5	9478	6.62412	0	4575362	6682300	63765140	6076	5834910	1830.7	92500.5	SD	1709824	1637687	215494	609596	812597
	2009	143093	105817	37873			16.9			14.8	18.9	57				58.9	54.8	4.7			3.1	6.2	22.8	28.6	15.7	8.6	9379	6.55449	0	4259477	3963433	61739751	7234	5401200	1796.03	89260	SD	1709824	1637687	215450	608371	813866
	2010	143154	105828	37790			17.5			15.3	19.6	57.5				59.2	55.6	5			3.3	6.6	23.2	28.9	16.2	8.7	9116	6.36797	0	4019050	3084351	41507581	5985	3219582	1762.47	87397.7	SD	1709825	1637687	213952	608599	815136
	2011	143264	105760	37679			18.1			15.7	20.4	58.1				59.5	56.4	5.3			3.5	7.1	23.5	29.2	16.7	8.9	8877	6.19625	0	6476078	6962438	56239994	6725	5332134	1711.04	87622.1	SD	1709825	1637687	214650	607942	815095
	2012	143421	105640	37530			18.8			16.2	21.2	58.7				59.8	57.3	5.7			3.7	7.6	23.9	29.5	17.2	9	10541	7.34971	0	5695071	8212924	37719640	6804	4027274	1725.07	85660.8	SD	1709825	1637687	214350	608283	815054
	2013	143597	105483	37350			19.4			16.7	22	59.3				60.2	58.1	6			3.9	8.1	24.4	29.8	17.7	9.1	12885	8.97301	0	6892734	11634943	52090797	7062	4931822	1715.29	86707.7	SD	1709825	1637687	216840	605834	815013
	2014	143761	105318	37149			20.1			17.2	22.8	59.9				60.6	59	6.4			4.1	8.6	24.8	30.1	18.2	9.3	20158	14.0218	0	7071956	11332138	59711382	7078	5273812	1687.79	87829.9	SD	1709825	1637687	217722	604994	814972
	2015	143888	105164	36935			20.7			17.6	23.6	60.5				60.9	59.9	6.7			4.3	9.1	25.2	30.5	18.8	SD	26773	18.6068	0	SD	13173296	61785799	7174	4535641	1665.14	86851.4	SD	1709825	1637687	217722	605035	814930
GERMANY	1975	78866.5	57843.8	21875			13.8			14.2	13.4	40.6				38.6	43	2.9			2.5	3.3	9.9	11.7	7.8	SD	SD	SD	0	341698	532412	9749836	6460	4225261	1670.71	76335.6	4932430	35697	34913	18792	SD	SD
	1976	78794.5	57838.1	21810			14.1			14.4	13.8	41.1				38.9	43.7	3			2.6	3.4	10.1	11.9	8.1	SD	SD	SD	0	329299	479726	9416595	4290	3003300	1671.03	77200.4	5209200	35697	34913	18758	SD	SD
	1977	78701.8	57811.5	21738			14.4			14.7	14.1	41.6				39.2	44.4	3			2.6	3.5	10.3	12	8.4	SD	SD	SD	0	359308	581311	10149096	6200	3125680	1670.98	77652.9	5050610	35697	34913	18709	SD	SD
	1978	78589.3	57770.4	21661			14.7			14.9	14.5	42.1				39.5	45.1	3.1			2.6	3.6	10.6	12.2	8.6	SD	SD	SD	0	396068	619416	11265143	7400	3797927	1694.9	79157.6	5108600	35697	34913	18659	SD	SD
	1979	78454.8	57720.8	21580			15			15.1	14.8	42.6				39.9	45.8	3.2			2.7	3.7	10.8	12.4	8.9	SD	SD	SD	0	321372	746481	11177128	7915	3525732	1711.25	80347.2	5309310	35697	34913	18594	SD	SD
	1980	78300.6	57669.5	21500			15.3			15.4	15.2	43.1				40.2	46.5	3.3			2.7	3.8	11	12.6	9.2	5.7	SD	SD	0	416583	675807	11253864	5660	3239715	1716.05	81067.2	5169350	35697	34913	18519	SD	SD
	1981	78126.1	57689.9	21349			15.6			15.6	15.5	43.6				40.5	47.2	3.3			2.7	3.9	11.3	12.8	9.5	5.6	SD	SD	0	393014	835360	11254906	5240	3275877	1731.36	80199.5	4856240	35697	34913	18461	SD	SD
	1982	77944.8	57697.1	21225			15.9			15.9	15.9	44.1				40.8	47.8	3.4			2.8	4.1	11.5	13	9.8	5.6	SD	SD	0	511534	1055271	11370906	6880	3960597	1740.58	81215	4753570	35697	34913	18396	SD	SD
	1983	77790.1	57634.8	21206			16.2			16.1	16.3	44.5				41	48.5	3.6			2.9	4.2	11.7	13.2	10.1	5.6	SD	SD	0	521508	933853	12548219	6720	2565400	1741.9	80424.1	4587420	35697	34913	18330	SD	SD
	1984	77704.3	57497.5	21328			16.6			16.4	16.7	45				41.4	49.1	3.7			3	4.4	12	13.4	10.4	5.6	SD	SD	0	588229	1026425	14125965	7850	3206514	1766.91	82407.8	4741130	35697	34913	18284	SD	SD
	1985	77717.4	57366.7	21530			16.9			16.7	17.1	45.5				41.7	49.8	3.8			3.1	4.6	12.3	13.6	10.8	5.6	SD	SD	0	718753	1204552	13801524	11240	3553924	1773.46	83538	4822760	35697	34913	18244	SD	SD
	1986	77837.5	57408.3	21648			17.4			17.1	17.6	46				42	50.6	4			3.2	4.8	12.6	13.8	11.1	5.7	SD	SD	0	855991	1303751	14601295	14783	2942432	1765.1	83290.6	4834470	35697	34913	18208	SD	SD
	1987	78054.1	57257.4	22041			17.8			17.4	18.2	46.6				42.4	51.4	4.2			3.3	5.1	12.9	14.1	11.5	5.7	SD	SD	0	997514	1217263	13971181	8444	2716771	1726.07	82468.4	4809980	35697	34913	18125	SD	SD
	1988	78354	58123.4	21499			18.3			17.8	18.8	47.2				42.9	52.2	4.4			3.5	5.3	13.2	14.4	11.9	5.7	SD	SD	0	1013017	1537410	15620731	7800	2545521	1691.86	81504.6	4874870	35697	34913	18097	SD	SD
	1989	78715.6	58396.5	21625			18.8			18.2	19.4	47.9				43.3	53	4.6			3.6	5.6	13.6	14.7	12.4	5.8	SD	SD	0	1154714	1573476	14509067	7612	2009515	1670.39	79521.6	4590900	35697	34913	18056	SD	SD
	1990	79118.3	58850.7	21636			19.3			18.6	20	48.5				43.8	53.8	4.9			3.7	5.9	14	15	12.8	5.8	19434	24.5632	0	1308059	1551758	15241870	6224	2105259	1631.18	79411.2	3350700	35697	34913	18032	5581	11300
	1991	79564.5	59367.1	21659			19.8			18.9	20.6	49.2				44.3	54.6	5.1			3.9	6.2	14.4	15.3	13.3	5.8	19623	24.663	0	1857673	1936987	16611967	7800	1866974	1530.27	74888	2968660	35697	34913	17136	6471.6	11305.4
	1992	80046.2	59880.1	21745			20.1			19.3	21.1	49.9				44.8	55.5	5.3			4	6.5	14.8	15.7	13.8	5.9	19522	24.3884	0	1701672	2139031	15541661	0	1314113	1370.92	68236.4	2843850	35697	34913	16951	6651.2	11310.8
	1993	80520.1	60337.4	21888			20.6			19.6	21.6	50.6				45.3	56.3	5.4			4.1	6.7	15.2	16	14.3	6	23808	29.5678	0	1836381	2656450	15766533	0	1730605	1315.66	66118.7	2672220	35699	34912	17162	6433.8	11316.2
	1994	80931	60691.5	22059			21			19.9	22	51.3				45.9	57.1	5.6			4.2	6.9	15.6	16.4	14.8	6	22459	27.7508	0	1910931	2445993	16480510	0	1663039	1297.13	66635.2	2906440	35700	34911	17308	6281.4	11321.6
	1995	81240.6	60935.6	22212			21.4			20.2	22.5	51.9				46.4	57.9	5.8			4.3	7.1	16.1	16.8	15.3	6.1	23328	28.7147	0	1948761	2394565	17763312	0	1420431	1299.47	66537.9	2820950	35702	34910	17343	6240	11327
	1996	81426.3	61067.1	22322			21.7			20.4	22.8	52.6				47	58.7	5.9			4.4	7.3	16.5	17.2	15.9	6.2	23940	29.4008	0	1286058	2912620	18921683	0	1605993	1291	66148.3	2818930	35703	34909	17337	6239.6	11332.4
	1997	81499.9	61090.2	22401			22			20.7	23.2	53.2				47.5	59.4	6.1			4.5	7.5	17	17.6	16.4	6.2	22359	27.4344	0	1840690	3188356	19826755	0	1599010	1282.06	66335.2	2856820	35703	34905	17327	6240.2	11337.8
	1998	81499.2	61042.8	22458			22.2			20.9	23.5	53.9				48.1	60.2	6.2			4.6	7.7	17.5	18	16.9	6.3	20663	25.3536	0	2203722	2781464	20187491	0	1279370	1237.3	65677.9	2938430	35703	34902	17373	6185.8	11343.2
	1999	81481.6	61002.1	22489			22.5			21.1	23.8	54.5				48.6	60.9	6.3			4.7	7.8	17.9	18.3	17.5	6.4	20947	25.7076	0	2721612	3256916	19615366	0	1339205	1210.67	65835.1	3033160	35703	34898	17152	6397.4	11348.6
	2000	81487.8	61020.4	22492			22.7			21.3	24.1	55.1				49	61.5	6.4			4.8	8	18.4	18.7	18	6.5	21180	25.9916	0	2246819	3324018	21621548	0	1087222	1182.82	63800.2	2742780	35703	34895	17068	6473	11354
	2001	81535.8	61110	22473			22.9			21.5	24.3	55.6				49.5	62.1	6.5			4.8	8.1	18.8	19.1	18.5	6.5	21878	26.8324	0	2556822	3504514	22837837	0	1151033	1172.46	63357.8	2613410	35703	34890	17034	6496	11360
	2002	81611.9	61236.1	22449			23.2			21.7	24.6	56.1				49.9	62.7	6.6			4.9	8.3	19.2	19.4	19	6.6	23607	28.9259	0	2349164	3738448	20817740	0	1015851	1148.79	62241.6	2594330	35704	34886	16967	6553	11366
	2003	81686.5	61360.6	22428			23.4			21.9	24.8	56.6				50.4	63.3	6.8			5	8.4	19.7	19.8	19.5	6.7	23941	29.3084	0	2237223	3421642	19259811	0	1201647	1111.12	61107.2	SD	35704	34881	17001	6508	11372
	2004	81715.7	61452.2	22397			23.6			22	25.1	57.1				50.8	63.8	6.9			5.1	8.6	20.1	20.1	20	6.7	23653	28.9455	0	3217033	4199857	25427210	0	1185792	1079.84	60312.4	SD	35705	34877	17013	6486	11378
	2005	81671.2	61497.8	22338			23.8			22.2	25.3	57.6				51.2	64.3	7			5.2	8.8	20.5	20.5	20.5	6.8	24342	29.8049	0	3084816	4082700	23692700	0	963600	1066.73	59885.1	SD	35709	34876	17031	6461	11384
	2006	81540.4	61544	22196			24			22.4	25.6	58				51.6	64.8	7.2			5.3	9	21	20.9	21.1	6.8	22308	27.3582	0	3252818	3220300	22427900	0	829900	1041.8	57667.7	SD	35710	34872	16946	6537	11389
	2007	81344.5	61593.1	21986			24.3			22.6	25.8	58.5				52.1	65.3	7.3			5.5	9.2	21.4	21.2	21.6	6.9	21871	26.8869	0	3225567	3809320	20828077	0	727926	1039.05	58891.4	SD	35710	34867	16950	6523	11394
	2008	81130.9	61613.1	21766			24.5			22.8	26.1	59				52.5	65.8	7.5			5.6	9.3	21.9	21.6	22.1	6.9	22330	27.5234	0	3123700	5105861	25988564	0	793188	1062.58	58525.7	SD	35711	34863	16921	6543	11399
	2009	80965.6	61632.9	21550			24.7			23	26.4	59.5				53	66.3	7.7			5.7	9.5	22.3	22	22.6	7	22769	28.1218	0	3820619	4527228	25192350	0	825575	1059.09	58524.8	SD	35712	34861	16886	6571	11404
	2010	80894.8	61674.6	21343			25			23.2	26.6	59.9				53.4	66.8	7.8			5.8	9.7	22.8	22.4	23.2	7.1	23131	28.5939	0	3453842	4211501	23782955	0	598049	1046.81	59061.3	SD	35712.7	34857	16700	6748	11409
	2011	80934	61745.3	21148			25.2			23.4	26.9	60.4				53.9	67.3	8			6	9.9	23.3	22.8	23.7	7.1	23552	29.1003	0	2360908	5183600	22782700	0	627400	1035.18	57715.2	SD	35714	34856	16719	6726	11411
	2012	81066.2	61841.6	20959			25.4			23.7	27.1	60.9				54.4	67.8	8.2			6.1	10.1	23.7	23.2	24.3	7.2	24055	29.6733	0	2936806	5514700	22409300	0	756500	1028.18	58004.8	SD	35717	34854	16664	6777	11413
	2013	81265.1	61953.8	20773			25.6			23.9	27.3	61.4				54.8	68.3	8.4			6.3	10.3	24.2	23.6	24.9	7.3	24257	29.8492	0	3511617	4387300	25019100	0	627700	1039.45	58801.6	SD	35734	34888	16697	6776	11415
	2014	81489.7	62067.1	20585			25.9			24.1	27.6	61.9				55.3	68.8	8.5			6.4	10.6	24.7	24.1	25.4	7.4	22643	27.7863	0	3794359	5142100	27784700	0	627100	1047	60192	SD	35738	34890	16725	6748	11417
	2015	81707.8	62170.1	20392			26.1			24.3	27.8	62.3				55.8	69.3	8.7			6.6	10.8	25.2	24.5	26	SD	24400	29.8625	0	SD	3973000	26549500	0	566300	1039.96	59049.3	SD	35740.9	34885.9	16731	6735.9	11419
ITALY	1975	55330.7	36166.2	18929			19.6			18.3	20.9	41.5				38.7	44.6	4.5			3.8	5.2	9.1	11.3	6.7	SD	SD	SD	0	120365	5258800	9480000	104500	499900	734.981	35462.9	1489730	30134	29411	17517	SD	SD
	1976	55604.3	36462.2	18914			20			8.6	21.4	42.1				39.2	45.2	4.6			3.9	5.4	9.4	11.6	7	SD	SD	SD	0	123152	5320500	9105800	107600	406200	749.55	35856.8	1434600	30134	29411	17529	SD	SD
	1977	55845.1	36738.2	18889			20.5			19	21.9	42.6				39.7	45.9	4.8			3.9	5.6	9.7	11.9	7.2	SD	SD	SD	0	119635	6396300	6238300	96600	346700	769.392	37160.9	1794650	30134	29411	17501	SD	SD
	1978	56057	36995.8	18853			20.9			19.3	22.4	43.1				40.1	46.5	4.9			4	5.8	9.9	12.1	7.5	SD	SD	SD	0	120077	6162000	9190500	92700	461000	760.784	38763.8	2238520	30134	29411	17589	SD	SD
	1979	56246.8	37237.6	18808			21.3			19.6	23	43.6				40.5	47.1	5.1			4.1	6	10.2	12.4	7.7	SD	13936	24.7765	0	131300	6197400	8980300	84200	431800	775.015	39478.8	2354720	30134	29411	17608	SD	SD
	1980	56419.3	37465.4	18755			21.8			20	23.5	44.1				40.9	47.7	5.2			4.2	6.2	10.4	12.6	8	5.8	16378	29.0291	0	131880	6376700	9156000	75700	449600	784.508	39097.5	2111490	30134	29411	17562	SD	SD
	1981	56576.5	37679.9	18696			22.2			20.3	24.1	44.6				41.3	48.3	5.3			4.3	6.4	10.7	12.9	8.3	5.8	16559	29.2683	0	132118	7196700	8830300	75100	417500	783.872	38900.2	2056660	30134	29411	17551	SD	SD
	1982	56717.1	37797.3	18712			22.6			20.6	24.6	45.1				41.7	48.8	5.5			4.3	6.6	10.9	13.1	8.5	5.8	18176	32.0468	0	136607	6792700	8968300	74600	356300	786.341	38960.7	2003550	30134	29411	17536	SD	SD
	1983	56838.7	37860.8	18761			23			20.9	25.1	45.5				42	49.4	5.6			4.4	6.8	11.2	13.3	8.8	5.9	20140	35.4336	0	199417	6698900	8717400	71800	312600	729.751	37272.4	2064440	30134	29411	17260	SD	SD
	1984	56937.7	37908	18801			23.5			21.2	25.6	46				42.4	49.9	5.8			4.5	7	11.4	13.6	9.1	5.9	18927	33.2416	0	253978	6672200	10057300	72400	429500	820.799	40651.3	2090630	30134	29411	17244	SD	SD
	1985	57012.4	37938.4	18833			23.9			21.5	26.1	46.4				42.8	50.5	5.9			4.6	7.2	11.7	13.8	9.4	6	18683	32.7701	0	426570	6356600	8460700	60600	362800	828.75	41011	2149600	30134	29411	17095	SD	SD
	1986	57061.8	37951.7	18857			24.2			21.8	26.6	46.9				43.1	51	6.1			4.7	7.4	12	14	9.7	6	17935	31.4308	0	881942	6401100	9102100	59800	397300	813.838	40410.1	2146290	30134	29411	17042	SD	SD
	1987	57089.5	37950	18873			24.6			22.1	27	47.4				43.5	51.6	6.2			4.8	7.6	12.2	14.3	10	6.1	17050	29.8654	0	1497776	5763700	9381000	51200	361400	807.08	40470.9	2276510	30134	29411	17012	SD	SD
	1988	57103.1	37939.4	18885			25			22.4	27.5	47.8				43.9	52.2	6.4			4.9	7.8	12.5	14.5	10.3	6.1	18352	32.1383	0	1386102	6288800	7951900	51700	382100	806.016	39742.2	2091980	30134	29411	16839	SD	SD
	1989	57113.2	37928.1	18896			25.4			22.7	27.9	48.3				44.3	52.8	6.5			5	8	12.8	14.8	10.6	6.2	18677	32.7017	0	1531847	6359500	7412900	41700	295500	800.783	39036.7	1812920	30134	29411	16850	SD	SD
	1990	57127.1	37921.7	18910			25.8			23.1	28.4	48.8				44.7	53.4	6.7			5.1	8.2	13.1	15	10.9	6.2	19356	33.8823	0	1657955	5863900	8108500	35900	298400	793.479	39404.7	1944380	30134	29411	16840	4981	7590
	1991	57152.5	37926.1	18929			26.2			23.4	28.9	49.4				45.1	54	6.9			5.3	8.5	13.4	15.3	11.3	6.3	19399	33.9425	0	1326903	6237700	9415660	35000	359440	740.241	37650.5	1986690	30134	29411	16054	5689.1	7667.9
	1992	57188.9	37972.5	18922			26.7			23.8	29.4	49.9				45.5	54.7	7.1			5.4	8.8	13.7	15.5	11.6	6.4	18675	32.6549	0	1038556	7394134	8938421	33751	333112	722.102	37104.2	1922000	30134	29411	15978	5687.2	7745.8
	1993	57226.6	38034.9	18902			27.2			24.3	30	50.5				46	55.3	7.4			5.6	9.1	14	15.8	12	6.4	16840	29.4269	0	654638	8028900	8169800	36753	372215	685.995	35947.9	1903900	30134	29411	15910	5677.3	7823.7
	1994	57251.4	38087.6	18877			27.7			24.7	30.5	51.1				46.5	56	7.6			5.8	9.4	14.4	16.1	12.4	6.5	16300	28.4709	0	893766	7483400	8251400	28010	354660	677.322	35455	1892200	30134	29411	15702	5807.4	7901.6
	1995	57255.2	38123.7	18843			28.2			25.2	31	51.7				47.1	56.7	7.9			6	9.7	14.7	16.4	12.8	6.6	17471	30.5143	0	943481	8440300	7946080	23647	301322	655.342	34666.2	1822000	30134	29411	15333	6098.5	7979.5
	1996	57229.7	38138	18799			28.7			25.7	31.6	52.3				47.6	57.5	8.2			6.3	10	15.1	16.8	13.2	6.7	18483	32.2962	0	986509	9547500	7987241	23137	349765	657.798	35116.5	1865000	30134	29411	15349	6004.6	8057.4
	1997	57184.9	38138.5	18749			29.2			26.2	32.1	53				48.2	58.2	8.5			6.5	10.3	15.5	17.1	13.7	6.8	17641	30.8491	0	1213912	10004698	6758351	22080	310706	656.5	34511.3	1758000	30134	29411	15345	5930.7	8135.3
	1998	57153.6	38147.8	18702			29.7			26.7	32.6	53.7				48.8	59	8.7			6.7	10.6	15.9	17.5	14.1	6.9	17798	31.1407	0	1272322	9030860	8338301	20682	377613	653.913	34450.8	1748000	30134	29411	15484	5713.8	8213.2
	1999	57180	38196.9	18676			30.2			27.2	33.1	54.3				49.4	59.8	9			7	10.9	16.3	17.8	14.6	7	18212	31.8503	0	996976	10017200	7742800	21321	331100	656.119	34597.5	1784000	30134	29411	15799	5320.9	8291.1
	2000	57293.7	38307.2	18679			30.7			27.7	33.6	55				50	60.5	9.3			7.2	11.2	16.7	18.2	15	7.1	17648	30.8027	0	1018562	10137500	7463968	20274	318241	658.916	34409.7	1732000	30134	29411	15637	5405	8369
	2001	57506.4	38485.3	18715			31.2			28.2	34.1	55.7				50.6	61.3	9.5			7.5	11.5	17.1	18.5	15.5	7.2	17833	31.0105	0	986503	10553706	6413300	19900	310100	562.696	30799.7	1405910	30134	29411	15502	5462	8447
	2002	57801.8	38745.9	18756			31.7			28.6	34.5	56.4				51.2	62	9.8			7.7	11.7	17.5	18.9	16	7.3	17620	30.4835	0	704697	10554422	7547763	18778	328759	609.663	32907.4	1432640	30134	29411	15273	5613	8525
	2003	58147	39061.7	18806			32.1			29.1	35	57				51.8	62.7	10			7.9	11.9	17.9	19.2	16.4	7.4	19759	33.9811	0	488125	8702288	6229453	12998	306424	584.946	31967.3	SD	30134	29414	14907	5904	8603
	2004	58494.7	39400.2	18867			32.5			29.5	35.4	57.6				52.3	63.4	10.2			8.1	12.2	18.3	19.6	16.9	7.5	18129	30.9925	0	600557	11368007	8638721	14371	337694	585.237	32537.5	SD	30134	29414	14883	5850	8681
	2005	58808.5	39743.3	18929			32.9			30	35.8	58.2				52.9	64	10.4			8.3	12.4	18.7	19.9	17.3	7.6	19491	33.1432	0	637036	10427930	7717129	18908	429153	568.284	31334.7	SD	30134	29414	14736	5919	8759
	2006	59079.9	40088.3	18990			33.3			30.4	36.1	58.8				53.4	64.7	10.6			8.5	12.6	19.1	20.2	17.8	7.7	19297	32.6626	0	669196	9671206	7181720	13063	394923	566.037	31195.3	SD	30134	29414	14203	6398.2	8812.8
	2007	59313.5	40434.8	19051			33.7			30.8	36.5	59.4				54	65.3	10.8			8.7	12.8	19.4	20.5	18.3	7.7	19898	33.5472	0	499956	9809266	7170181	12057	361147	560.876	31260	SD	30134	29414	14162	6385.4	8866.6
	2008	59502.4	40769.3	19105			34.1			31.1	36.8	59.9				54.5	65.9	11			8.9	13	19.8	20.8	18.7	7.8	20233	34.0037	0	470771	9491203	8855440	12114	356404	575.5	30882.9	SD	30134	29414	14457.2	6036.4	8920.4
	2009	59641.9	41075.9	19144			34.4			31.5	37.1	60.5				55	66.4	11.2			9.1	13.2	20.2	21.1	19.2	7.9	20823	34.9134	0	575037	7877700	6534746	11844	315100	570.762	29654.3	SD	30134	29414	13982.4	6457.4	8974.2
	2010	59729.8	41343.7	19165			34.8			31.9	37.5	61				55.5	67	11.4			9.3	13.3	20.6	21.4	19.7	8	20620	34.5221	0	622501	8495940	6849858	13181	288880	570.346	29717.3	SD	30134	29414	14327.8	6058.2	9028
	2011	59759.9	41565.3	19164			35.1			32.2	37.8	61.5				56	67.5	11.6			9.5	13.5	21	21.7	20.1	8.1	21159	35.4067	0	658913	9752592	6641807	11970	297078	545.857	29126	SD	30134	29414	13852.6	6479.6	9081.8
	2012	59733.8	41742.7	19142			35.4			32.6	38.1	62.1				56.5	68.1	11.7			9.6	13.7	21.4	22.1	20.6	8.2	21536	36.0533	0	493905	7860123	7654248	11809	292357	558.854	29766.4	SD	30134	29414	13729	6549.4	9135.6
	2013	59668	41891.8	19099			35.8			33	38.4	62.6				57.1	68.6	11.9			9.8	13.9	21.7	22.4	21.1	8.3	20921	35.0623	0	709787	7899617	7312025	11804	246916	549.731	29282.1	SD	30134	29414	13630	6594.6	9189.4
	2014	59585.7	42028.9	19041			36.1			33.3	38.7	63.1				57.6	69.1	12.1			10	14.1	22.1	22.7	21.5	8	20183	33.8722	0	938380	9239545	7141926	11049	240960	540.672	28927.7	SD	30134	29414	13162	7008.8	9243.2
	2015	59504.2	42166.1	18976			36.4			33.7	39.1	63.6				58.1	69.6	12.3			10.2	14.3	22.5	23	22	SD	22246	37.3856	0	SD	7073896	7394495	12215	261366	542	28943.7	SD	30134	29414	12945	7172	9297
